# Supplementary material for: 1,5-Disubstituted Acylated 2-Amino-4,5-dihydroimidazoles as a New Class of Retinoic Acid Receptor–Related Orphan Receptor (ROR) Inhibitors
Source: MDPI journal article supplement (doi:10.3390/ijms23084433), 2022-04-17

# **1,5-Disubstituted acylated 2-amino-4,5-dihydroimidazoles as a new class of retinoic acid receptor-related orphan receptor (ROR) inhibitors**

Maria A. Ortiz <sup>1</sup>, F. Javier Piedrafita <sup>1</sup>, and Adel Nefzi <sup>2\*</sup>

<sup>1</sup> Donald P. Shiley BioScience Center, San Diego State University, 5500 Campanile Drive, San Diego, California 92182-4650

<sup>2</sup> Center for Translational Science, Florida International University, 11350 SW Village Parkway, Port Saint Lucie, FL 34987

## **Supplementary material**

Distribution list and activity of the positional scanning library **1295**.

Distribution list and activity of the individual controls **1295**.

Distribution list and activity of the compounds 2520 derived from the deconvolution of the mixture-based library.

LCMS of the selected active compounds

**Table S1: distribution list of library 1295**

| Library 1295                                 |                                            | 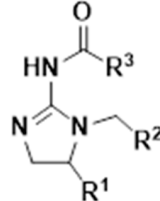<br>Acylated cyclic<br>guanidine PS-<br>SCL |                                                    | Total diversity: 45,288 compounds |                                    |                                     |  |
|----------------------------------------------|--------------------------------------------|------------------------------------------------------------------------------------------------------------------------------|----------------------------------------------------|-----------------------------------|------------------------------------|-------------------------------------|--|
| Functional group<br>Compounds per<br>mixture | R1<br>34 amino acids<br>1,332<br>(37 x 36) | R2<br>37 carboxylic<br>acids<br>1,224<br>(34 x 36)                                                                           | R3<br>36 carboxylic<br>acids<br>1,258<br>(37 x 34) | Nomenclature                      | % Inhibition<br>at 10 µg/ml<br>N=3 | IC <sub>50</sub><br>in µg/ml<br>N=3 |  |
| 1295.001                                     | Boc-L-Ala                                  | X                                                                                                                            | X                                                  | S-methyl                          | 59.4 ± 1.3                         |                                     |  |
| 1295.002                                     | Boc-L-Phe                                  | X                                                                                                                            | X                                                  | S-benzyl                          | 94.1 ± 0.5                         | 2.054 ± 0.166                       |  |
| 1295.003                                     | Boc-Gly                                    | X                                                                                                                            | X                                                  | hydrogen                          | 35.0 ± 4.7                         |                                     |  |
| 1295.004                                     | Boc-L-Ile                                  | X                                                                                                                            | X                                                  | S-2-butyl                         | 22.6 ± 2.8                         |                                     |  |
| 1295.005                                     | Boc-L-Leu                                  | X                                                                                                                            | X                                                  | S-isobutyl                        | -23.7 ± 1.4                        |                                     |  |
| 1295.006                                     | Boc-L-Val                                  | X                                                                                                                            | X                                                  | S-isopropyl                       | 13.4 ± 2.4                         |                                     |  |
| 1295.007                                     | Boc-L-Tyr(BrZ)                             | X                                                                                                                            | X                                                  | S-4-hydroxybenzyl                 | 4.3 ± 2.9                          |                                     |  |
| 1295.008                                     | Boc-D-Ala                                  | X                                                                                                                            | X                                                  | R-methyl                          | 48.6 ± 2.7                         |                                     |  |
| 1295.009                                     | Boc-D-Phe                                  | X                                                                                                                            | X                                                  | R-benzyl                          | 98.7 ± 2.3                         | 2.257 ± 0.247                       |  |
| 1295.010                                     | Boc-D-Ile                                  | X                                                                                                                            | X                                                  | R-2-butyl                         | 88.6 ± 2.3                         | 2.024 ± 0.181                       |  |
| 1295.011                                     | Boc-D-Leu                                  | X                                                                                                                            | X                                                  | R-isobutyl                        | 97.6 ± 1.8                         | 1.684 ± 0.114                       |  |
| 1295.012                                     | Boc-D-Val                                  | X                                                                                                                            | X                                                  | R-isopropyl                       | 77.5 ± 3.1                         |                                     |  |
| 1295.013                                     | Boc-D-Tyr(BrZ)                             | X                                                                                                                            | X                                                  | S-4-hydroxybenzyl                 | 55.9 ± 7.0                         |                                     |  |
| 1295.014                                     | Boc-a-aminoisobutyric acid                 | X                                                                                                                            | X                                                  | 2 different methyls at R1         | 64.6 ± 7.8                         |                                     |  |
| 1295.015                                     | Boc-L-Norvaline                            | X                                                                                                                            | X                                                  | S-propyl                          | 72.4 ± 7.8                         |                                     |  |
| 1295.016                                     | Boc-D-Norvaline                            | X                                                                                                                            | X                                                  | R-propyl                          | 84.7 ± 3.8                         | 3.118 ± 0.476                       |  |
| 1295.017                                     | Boc-L-Norleucine                           | X                                                                                                                            | X                                                  | S-butyl                           | 70.6 ± 6.5                         |                                     |  |
| 1295.018                                     | Boc-D-Norleucine                           | X                                                                                                                            | X                                                  | R-butyl                           | 39.4 ± 4.7                         |                                     |  |
| 1295.019                                     | Boc-L-Phenylglycine                        | X                                                                                                                            | X                                                  | S-phenyl                          | 12.7 ± 8.4                         |                                     |  |
| 1295.020                                     | Boc-D-Phenylglycine                        | X                                                                                                                            | X                                                  | R-phenyl                          | 69.5 ± 4.2                         |                                     |  |
| 1295.021                                     | Boc-L-Naphthylalanine                      | X                                                                                                                            | X                                                  | S-2-naphthylmethyl                | 26.7 ± 4.4                         |                                     |  |
| 1295.022                                     | Boc-D-Naphthylalanine                      | X                                                                                                                            | X                                                  | R-2-naphthylmethyl                | 57.3 ± 11.5                        |                                     |  |
| 1295.023                                     | Boc-L-cyclohexylAlani ne                   | X                                                                                                                            | X                                                  | S-cyclohexyl                      | 91.3 ± 3.1                         | 1.801 ± 0.157                       |  |
| 1295.024                                     | Boc-D-cyclohexylAlani ne                   | X                                                                                                                            | X                                                  | R-cyclohexyl                      | 84.8 ± 1.8                         | 2.672 ± 0.324                       |  |
| 1295.025                                     | Boc-L-4-Chlorophenyllala nine              | X                                                                                                                            | X                                                  | S-4-chloro-benzyl                 | 86.3 ± 0.3                         | 2.294 ± 0.262                       |  |
| 1295.026                                     | Boc-D-4-Chlorophenyllala nine              | X                                                                                                                            | X                                                  | R-4-chloro-benzyl                 | 46.6 ± 0.0                         |                                     |  |

|          |                                |                                               |   |                                         |             |               |
|----------|--------------------------------|-----------------------------------------------|---|-----------------------------------------|-------------|---------------|
| 1295.027 | Boc-L-4-Fluorophenylalanine    | X                                             | X | S-4-fluorobenzyl                        | 39.9 ± 9.5  |               |
| 1295.028 | Boc-D-4-Fluorophenylalanine    | X                                             | X | R-4-fluorobenzyl                        | 90.7 ± 0.9  | 1.923 ± 0.131 |
| 1295.029 | Boc-L-(3-pyridyl)alanine       | X                                             | X | S-pyridin-3-ylmethyl                    | -3.2 ± 7.4  |               |
| 1295.030 | Boc-D-(3-pyridyl)alanine       | X                                             | X | R-pyridin-3-ylmethyl                    | 21.1 ± 12.0 |               |
| 1295.031 | Boc-L- <i>α</i> -tButylglycine | X                                             | X | S-tert-butyl                            | 87.4 ± 1.9  | 3.284 ± 0.254 |
| 1295.032 | Boc-D- <i>α</i> -tbutylglycine | X                                             | X | R-tert-butyl                            | 93.4 ± 3.2  | 2.914 ± 0.322 |
| 1295.033 | Boc-O-ethyl-L-Tyrosine         | X                                             | X | S-4-ethoxybenzyl                        | 94.2 ± 0.8  | 1.916 ± 0.179 |
| 1295.034 | Boc-O-ethyl-D-Tyrosine         | X                                             | X | R-4-ethoxybenzyl                        | 91.8 ± 0.1  | 2.018 ± 0.151 |
| 1295.035 | X                              | 2-phenylbutyric acid                          | X | 2-phenylbutyl                           | 67.8 ± 2.8  |               |
| 1295.036 | X                              | 3-Phenylbutyric Acid                          | X | 3-phenylbutyl                           | 66.1 ± 1.6  |               |
| 1295.037 | X                              | <i>m</i> -Tolylacetic Acid                    | X | <i>m</i> -tolylethyl                    | 75.9 ± 1.2  | 2.615 ± 0.230 |
| 1295.038 | X                              | 3-Fluorophenylacetic Acid                     | X | 2-(3-fluorophenyl)-ethyl                | 5.4 ± 3.8   |               |
| 1295.039 | X                              | 3-Bromophenylacetic Acid                      | X | 2-(3-bromophenyl)-ethyl                 | 55.8 ± 3.1  |               |
| 1295.040 | X                              | 4-Fluorophenylacetic Acid                     | X | 2-(4-fluorophenyl)-ethyl                | 60.9 ± 0.6  |               |
| 1295.041 | X                              | 3-Methoxyphenylacetic Acid                    | X | 2-(3-methoxyphenyl)-ethyl               | -7.4 ± 0.4  |               |
| 1295.042 | X                              | 4-Bromophenylacetic Acid                      | X | 2-(4-bromophenyl)-ethyl                 | 49.1 ± 1.3  |               |
| 1295.043 | X                              | 4-Methoxyphenylacetic Acid                    | X | 2-(4-methoxyphenyl)-ethyl               | -1.4 ± 2.2  |               |
| 1295.044 | X                              | 4-Ethoxyphenylacetic Acid                     | X | 2-(4-ethoxyphenyl)-ethyl                | 48.7 ± 3.7  |               |
| 1295.045 | X                              | 4-Isobutyl- <i>α</i> -Methylphenylacetic Acid | X | 2-(4-Isobutylphenyl)-propyl             | 67.3 ± 1.0  |               |
| 1295.046 | X                              | 3,5-Bis(Trifluoromethyl)-Phenylacetic Acid    | X | 2-(3,5-bis-trifluoromethylphenyl)-ethyl | 63.0 ± 1.1  |               |
| 1295.047 | X                              | 3-(3,4-Dimethoxyphenyl)-Propionic Acid        | X | 3-(3,4-dimethoxyphenyl)-propyl          | 81.2 ± 0.2  | 1.246 ± 0.252 |
| 1295.048 | X                              | 4-Biphenylacetic Acid                         | X | 2-Biphenyl-4-ylethyl                    | 58.5 ± 1.0  |               |
| 1295.049 | X                              | (3,4-Dimethoxyphenyl) Acetic Acid             | X | 2-(3,4-dimethoxyphenyl)-ethyl           | 14.1 ± 2.8  |               |
| 1295.050 | X                              | Phenylacetic Acid                             | X | phenethyl                               | 78.9 ± 1.3  | 1.771 ± 0.132 |
| 1295.051 | X                              | Hydrocinnamic Acid                            | X | phenylpropyl                            | 80.8 ± 1.1  | 2.123 ± 0.142 |

|          |   |                                       |                                       |                                 |              |               |
|----------|---|---------------------------------------|---------------------------------------|---------------------------------|--------------|---------------|
| 1295.052 | X | 4-Phenylbutyric Acid                  | X                                     | 4-phenylbutyl                   | 25.7 ± 4.3   |               |
| 1295.053 | X | Butyric Acid                          | X                                     | butyl                           | 48.0 ± 0.6   |               |
| 1295.054 | X | Heptanoic Acid                        | X                                     | heptyl                          | -4.2 ± 2.5   |               |
| 1295.055 | X | Isobutyric Acid                       | X                                     | isobutyl                        | -28.1 ± 0.5  |               |
| 1295.056 | X | (+/-)-2-Methylbutyric Acid            | X                                     | (+/-)-2-Methylbutyl             | -4.1 ± 13.0  |               |
| 1295.057 | X | Isovaleric Acid                       | X                                     | 3-methylbutyl                   | 24.6 ± 5.3   |               |
| 1295.058 | X | 4-Methylvaleric Acid                  | X                                     | 4-methylpentyl                  | -8.6 ± 6.8   |               |
| 1295.059 | X | Trimethylacetic Acid                  | X                                     | <i>t</i> -butylmethyl           | 10.4 ± 9.6   |               |
| 1295.060 | X | Cyclohexanecarboxylic Acid            | X                                     | cyclohexylmethyl                | 87.5 ± 0.3   | 2.507 ± 0.245 |
| 1295.061 | X | Cyclohexylacetic Acid                 | X                                     | cyclohexyl-ethyl                | 13.0 ± 1.7   |               |
| 1295.062 | X | Cyclohexanecarboxylic Acid            | X                                     | cyclohexyl-butyl                | 10.4 ± 2.3   |               |
| 1295.063 | X | Cycloheptanecarboxylic Acid           | X                                     | cycloheptylmethyl               | 44.0 ± 9.5   |               |
| 1295.064 | X | Acetic Acid                           | X                                     | ethyl                           | -47.8 ± 11.8 |               |
| 1295.065 | X | Cyclobutanecarboxylic Acid            | X                                     | cyclobutylmethyl                | -62.4 ± 14.0 |               |
| 1295.066 | X | Cyclopentanecarboxylic Acid           | X                                     | cyclopentylmethyl               | -67.2 ± 7.5  |               |
| 1295.067 | X | 3-Cyclopentylpropionic Acid           | X                                     | 3-cyclopentylpropyl             | -2.1 ± 36.7  |               |
| 1295.068 | X | Cyclohexanepropionic Acid             | X                                     | cyclohexylpropyl                | 80.4 ± 0.6   | 2.582 ± 0.201 |
| 1295.069 | X | 4-Methyl-1-Cyclohexanecarboxylic Acid | X                                     | 4-methyl-1-cyclohexylmethyl     | 81.0 ± 5.2   | 2.038 ± 0.126 |
| 1295.070 | X | 2-Norbornaneacetic Acid               | X                                     | 2-Bicyclo[2.2.1]hept-2-yl-ethyl | 68.4 ± 0.9   |               |
| 1295.071 | X | 1-Adamantaneacetic Acid               | X                                     | 2-adamantan-1-yl-ethyl          | 74.7 ± 1.4   | 2.034 ± 0.125 |
| 1295.072 | X | X                                     | 1-phenyl-1cyclopropanecarboxylic acid | 1-phenyl-cyclopropyl            | 86.9 ± 2.9   | 1.957 ± 0.181 |
| 1295.073 | X | X                                     | 2-Phenylbutyric Acid                  | 1-phenyl-propyl                 | -60.0 ± 6.9  |               |
| 1295.074 | X | X                                     | 3-Phenylbutyric Acid                  | 2-phenyl-propyl                 | -51.9 ± 14.0 |               |
| 1295.075 | X | X                                     | m-Tolylacetic Acid                    | 4-methyl-benzyl                 | 65.1 ± 6.0   |               |
| 1295.076 | X | X                                     | 3-Fluorophenylacetic Acid             | 3-fluoro-benzyl                 | 53.7 ± 13.5  |               |
| 1295.077 | X | X                                     | 3-Bromophenylacetic Acid              | 3-bromo-benzyl                  | 50.4 ± 2.2   |               |
| 1295.078 | X | X                                     | 4-Fluorophenylacetic Acid             | 4-fluoro-benzyl                 | 68.4 ± 8.5   |               |
| 1295.079 | X | X                                     | 3-Methoxyphenylacetic Acid            | 3-methoxy-benzyl                | 26.2 ± 6.3   |               |
| 1295.080 | X | X                                     | 4-Bromophenylacetic Acid              | 4-bromo-benzyl                  | -4.5 ± 21.2  |               |

|          |   |   |                                          |                                    |             |               |
|----------|---|---|------------------------------------------|------------------------------------|-------------|---------------|
| 1295.081 | X | X | 4-Methoxyphenylacetic Acid               | 4-methoxy-benzyl                   | 50.5 ± 2.7  |               |
| 1295.082 | X | X | 4-Ethoxyphenylacetic Acid                | 4-ethoxy-benzyl                    | 54.8 ± 3.8  |               |
| 1295.083 | X | X | 4-Isobutyl-alpha-Methylphenylacetic Acid | 4-isobutyl-benzyl                  | 95.2 ± 0.1  | 1.783 ± 0.124 |
| 1295.084 | X | X | 3-(3,4-Dimethoxyphenyl)-Propionic Acid   | 2-(3,4-dimethoxy-phenyl)-ethyl     | 87.5 ± 0.9  | 3.769 ± 0.420 |
| 1295.085 | X | X | 4-Biphenylacetic Acid                    | Biphenyl-4-yl-methyl               | 73.7 ± 0.6  |               |
| 1295.086 | X | X | 2-(Trifluoromethyl)-cinnamic Acid        | 2-(2-trifluoromethyl-phenyl)-vinyl | 95.6 ± 0.5  | 2.062 ± 0.151 |
| 1295.087 | X | X | (3,4-Dimethoxyphenyl) Acetic Acid        | 3,4-dimethoxy-benzyl               | 75.6 ± 2.7  |               |
| 1295.088 | X | X | m-toluic acid                            | 3-methyl-phenyl                    | 47.3 ± 0.0  |               |
| 1295.089 | X | X | Hydrocinnamic Acid                       | 2-phenyl-ethyl                     | 92.0 ± 0.3  | 3.458 ± 0.283 |
| 1295.090 | X | X | 4-Phenylbutyric Acid                     | 3-phenyl-propyl                    | 72.1 ± 3.7  |               |
| 1295.091 | X | X | phenylacetic acid                        | benzyl                             | 52.8 ± 1.5  |               |
| 1295.092 | X | X | 4-Ethyl-4-Biphenylcarboxylic Acid        | 4'-ethyl-biphenyl-4-yl             | -7.7 ± 0.4  |               |
| 1295.093 | X | X | Butyric Acid                             | propyl                             | 32.9 ± 1.6  |               |
| 1295.094 | X | X | Heptanoic Acid                           | hexyl                              | 89.7 ± 2.8  | 3.413 ± 0.191 |
| 1295.095 | X | X | Isobutyric Acid                          | isopropyl                          | 64.7 ± 2.7  |               |
| 1295.096 | X | X | (+/-)-2-Methylbutyric Acid               | 1-methyl-propyl                    | 51.0 ± 3.4  |               |
| 1295.097 | X | X | 4-Methylvaleric Acid                     | 3-methyl-butyl                     | 75.3 ± 6.8  |               |
| 1295.098 | X | X | Trimethylacetic Acid                     | <i>tert</i> -butyl                 | 65.1 ± 6.4  |               |
| 1295.099 | X | X | Cyclohexylacetic Acid                    | cyclohexyl-methyl                  | 60.0 ± 2.3  |               |
| 1295.100 | X | X | Cyclohexanecarboxylic Acid               | cyclohexyl-propyl                  | 65.1 ± 1.8  |               |
| 1295.101 | X | X | Acetic Acid                              | ethyl                              | 38.2 ± 3.2  |               |
| 1295.102 | X | X | Cyclobutanecarboxylic Acid               | cyclobutyl                         | 0.2 ± 8.8   |               |
| 1295.103 | X | X | Cyclopentanecarboxylic Acid              | cyclopentyl                        | 22.0 ± 16.6 |               |
| 1295.104 | X | X | 3-Cyclopentylpropionic Acid              | 2-cyclopentyl-ethyl                | 76.0 ± 4.3  |               |
| 1295.105 | X | X | Cyclohexanepropionic Acid                | 2-cyclohexyl-ethyl                 | 87.0 ± 2.5  | 2.721 ± 0.164 |
| 1295.106 | X | X | 4-Methyl-1-Cyclohexanecarboxylic Acid    | 4-methyl-cyclohexyl                | 70.9 ± 4.4  |               |
| 1295.107 | X | X | 2-Norbornaneacetic Acid                  | Bicyclo[2.2.1]hept-2-yl-methyl     | 76.2 ± 2.6  | 3.281 ± 0.322 |

X = equimolar mixture of aminoacids (R1) or carboxylic acids (R2 and R3)

**Table S2: Individual Controls prepared in parallel to the synthesis of library 1295**

**TPI 1295**      Acylated cyclic guanidine  
**Controls: 201-307**

| bag no.  | R1                          | R2                         | R3                | mol wt. | % Inhibition ROR <sub>y</sub> |
|----------|-----------------------------|----------------------------|-------------------|---------|-------------------------------|
|          |                             |                            |                   |         | 5 µg/ml                       |
| 1295.201 | Boc-L-Ala                   | Phenylacetic Acid          | phenylacetic acid | 321.2   | -40.7 ± 14.9                  |
| 1295.202 | Boc-L-Phe                   | Phenylacetic Acid          | phenylacetic acid | 397.2   | 0.0 ± 7.2                     |
| 1295.203 | Boc-Gly                     | Phenylacetic Acid          | phenylacetic acid | 307.2   | -29.5 ± 4.6                   |
| 1295.204 | Boc-L-Ile                   | Phenylacetic Acid          | phenylacetic acid | 363.2   | -16.2 ± 8.9                   |
| 1295.205 | Boc-L-Leu                   | Phenylacetic Acid          | phenylacetic acid | 363.2   | 54.1 ± 17.5                   |
| 1295.206 | Boc-L-Val                   | Phenylacetic Acid          | phenylacetic acid | 349.2   | 32.7 ± 11.5                   |
| 1295.207 | Boc-L-Tyr(BrZ)              | Phenylacetic Acid          | phenylacetic acid | 413.2   | -85.0 ± 23.7                  |
| 1295.208 | Boc-D-Ala                   | Phenylacetic Acid          | phenylacetic acid | 321.2   | -9.3 ± 14.3                   |
| 1295.209 | Boc-D-Phe                   | Phenylacetic Acid          | phenylacetic acid | 397.2   | 46.8 ± 19.0                   |
| 1295.210 | Boc-D-Ile                   | Phenylacetic Acid          | phenylacetic acid | 363.2   | -17.7 ± 13.9                  |
| 1295.211 | Boc-D-Leu                   | Phenylacetic Acid          | phenylacetic acid | 363.2   | 38.8 ± 15.2                   |
| 1295.212 | Boc-D-Val                   | Phenylacetic Acid          | phenylacetic acid | 349.2   | 33.3 ± 15.5                   |
| 1295.213 | Boc-D-Tyr(BrZ)              | Phenylacetic Acid          | phenylacetic acid | 413.2   | -33.8 ± 29.9                  |
| 1295.214 | Boc-α-aminoisobutyric acid  | Phenylacetic Acid          | phenylacetic acid | 335.2   | 1.6 ± 17.1                    |
| 1295.215 | Boc-L-Norvaline             | Phenylacetic Acid          | phenylacetic acid | 349.2   | 31.5 ± 18.4                   |
| 1295.216 | Boc-D-Norvaline             | Phenylacetic Acid          | phenylacetic acid | 349.2   | 24.5 ± 12.1                   |
| 1295.217 | Boc-L-Norleucine            | Phenylacetic Acid          | phenylacetic acid | 363.2   | 13.0 ± 15.8                   |
| 1295.218 | Boc-D-Norleucine            | Phenylacetic Acid          | phenylacetic acid | 363.2   | -11.7 ± 2.2                   |
| 1295.219 | Boc-L-Phenylglycine         | Phenylacetic Acid          | phenylacetic acid | 383.2   | 0.1 ± 2.8                     |
| 1295.220 | Boc-D-Phenylglycine         | Phenylacetic Acid          | phenylacetic acid | 383.2   | -5.2 ± 9.1                    |
| 1295.221 | Boc-L-Naphthylalanine       | Phenylacetic Acid          | phenylacetic acid | 447.2   | 31.3 ± 2.1                    |
| 1295.222 | Boc-D-Naphthylalanine       | Phenylacetic Acid          | phenylacetic acid | 447.2   | 22.4 ± 3.1                    |
| 1295.223 | Boc-L-cyclohexylAlanine     | Phenylacetic Acid          | phenylacetic acid | 403.3   | 3.4 ± 0.9                     |
| 1295.224 | Boc-D-cyclohexylAlanine     | Phenylacetic Acid          | phenylacetic acid | 403.3   | 9.6 ± 4.9                     |
| 1295.225 | Boc-L-4-Chlorophenylalanine | Phenylacetic Acid          | phenylacetic acid | 431.2   | -32.6 ± 2.9                   |
| 1295.226 | Boc-D-4-Chlorophenylalanine | Phenylacetic Acid          | phenylacetic acid | 431.2   | 6.9 ± 1.9                     |
| 1295.227 | Boc-L-4-Fluorophenylalanine | Phenylacetic Acid          | phenylacetic acid | 415.2   | -8.2 ± 7.0                    |
| 1295.228 | Boc-D-4-Fluorophenylalanine | Phenylacetic Acid          | phenylacetic acid | 415.2   | 31.3 ± 4.2                    |
| 1295.229 | Boc-L-(3-pyridyl)alanine    | Phenylacetic Acid          | phenylacetic acid | 398.2   | -23.1 ± 0.3                   |
| 1295.230 | Boc-D-(3-pyridyl)alanine    | Phenylacetic Acid          | phenylacetic acid | 398.2   | -16.0 ± 5.9                   |
| 1295.231 | Boc-L-α-tButylglycine       | Phenylacetic Acid          | phenylacetic acid | 363.2   | -31.5 ± 0.2                   |
| 1295.232 | Boc-D-α-tbutylglycine       | Phenylacetic Acid          | phenylacetic acid | 363.2   | 8.2 ± 1.3                     |
| 1295.233 | Boc-O-ethyl-L-Tyrosine      | Phenylacetic Acid          | phenylacetic acid | 441.2   | 31.0 ± 2.0                    |
| 1295.234 | Boc-O-ethyl-D-Tyrosine      | Phenylacetic Acid          | phenylacetic acid | 441.2   | -7.7 ± 1.0                    |
| 1295.235 | Boc-L-Phe                   | 2-phenylbutyric acid       | phenylacetic acid | 425.3   | 35.8 ± 2.2                    |
| 1295.236 | Boc-L-Phe                   | 3-Phenylbutyric Acid       | phenylacetic acid | 425.3   | 26.8 ± 8.6                    |
| 1295.237 | Boc-L-Phe                   | m-Tolylacetic Acid         | phenylacetic acid | 411.2   | -4.8 ± 8.6                    |
| 1295.238 | Boc-L-Phe                   | 3-Fluorophenylacetic Acid  | phenylacetic acid | 415.2   | 34.6 ± 10.8                   |
| 1295.239 | Boc-L-Phe                   | 3-Bromophenylacetic Acid   | phenylacetic acid | 475.2   | 47.8 ± 4.4                    |
| 1295.240 | Boc-L-Phe                   | 4-Fluorophenylacetic Acid  | phenylacetic acid | 415.2   | 52.2 ± 4.6                    |
| 1295.241 | Boc-L-Phe                   | 3-Methoxyphenylacetic Acid | phenylacetic acid | 427.2   | 7.4 ± 1.2                     |
| 1295.242 | Boc-L-Phe                   | 4-Bromophenylacetic Acid   | phenylacetic acid | 475.2   | 67.1 ± 5.4                    |
| 1295.243 | Boc-L-Phe                   | 4-Methoxyphenylacetic Acid | phenylacetic acid | 427.2   | 27.2 ± 17.9                   |
| 1295.244 | Boc-L-Phe                   | 4-Ethoxyphenylacetic Acid  | phenylacetic acid | 441.2   | 5.9 ± 3.0                     |

|          |           |                                               |                                               |       |                  |
|----------|-----------|-----------------------------------------------|-----------------------------------------------|-------|------------------|
| 1295.245 | Boc-L-Phe | 4-Isobutyl- $\alpha$ -Methylphenylacetic Acid | phenylacetic acid                             | 467.3 | 21.5 $\pm$ 2.7   |
| 1295.246 | Boc-L-Phe | 3,5-Bis(Trifluoromethyl)-Phenylacetic Acid    | phenylacetic acid                             | 533.2 | 20.0 $\pm$ 0.0   |
| 1295.247 | Boc-L-Phe | 3-(3,4-Dimethoxyphenyl)-Propionic Acid        | phenylacetic acid                             | 471.3 | 32.5 $\pm$ 3.7   |
| 1295.248 | Boc-L-Phe | 4-Biphenylacetic Acid                         | phenylacetic acid                             | 473.3 | 91.5 $\pm$ 4.0   |
| 1295.249 | Boc-L-Phe | (3,4-Dimethoxyphenyl) Acetic Acid             | phenylacetic acid                             | 457.2 | 42.2 $\pm$ 4.4   |
| 1295.250 | Boc-L-Phe | Phenylacetic Acid                             | phenylacetic acid                             | 397.2 | 9.9 $\pm$ 2.3    |
| 1295.251 | Boc-L-Phe | Hydrocinnamic Acid                            | phenylacetic acid                             | 411.2 | -112.4 $\pm$ 7.9 |
| 1295.252 | Boc-L-Phe | 4-Phenylbutyric Acid                          | phenylacetic acid                             | 425.3 | -2.3 $\pm$ 1.4   |
| 1295.253 | Boc-L-Phe | Butyric Acid                                  | phenylacetic acid                             | 349.2 | -12.1 $\pm$ 3.5  |
| 1295.254 | Boc-L-Phe | Heptanoic Acid                                | phenylacetic acid                             | 391.3 | 48.4 $\pm$ 2.8   |
| 1295.255 | Boc-L-Phe | Isobutyric Acid                               | phenylacetic acid                             | 349.2 | -9.8 $\pm$ 2.4   |
| 1295.256 | Boc-L-Phe | (+/-)-2-Methylbutyric Acid                    | phenylacetic acid                             | 363.2 | -8.1 $\pm$ 1.4   |
| 1295.257 | Boc-L-Phe | Isovaleric Acid                               | phenylacetic acid                             | 363.2 | -28.5 $\pm$ 4.3  |
| 1295.258 | Boc-L-Phe | 4-Methylvaleric Acid                          | phenylacetic acid                             | 377.3 | -14.5 $\pm$ 5.2  |
| 1295.259 | Boc-L-Phe | Trimethylacetic Acid                          | phenylacetic acid                             | 363.2 | -25.1 $\pm$ 3.1  |
| 1295.260 | Boc-L-Phe | Cyclohexanecarboxylic Acid                    | phenylacetic acid                             | 389.3 | -10.7 $\pm$ 2.1  |
| 1295.261 | Boc-L-Phe | Cyclohexylacetic Acid                         | phenylacetic acid                             | 403.3 | 95.9 $\pm$ 0.0   |
| 1295.262 | Boc-L-Phe | Cyclohexanebutyric Acid                       | phenylacetic acid                             | 431.3 | -30.5 $\pm$ 6.8  |
| 1295.263 | Boc-L-Phe | Cycloheptanecarboxylic Acid                   | phenylacetic acid                             | 403.3 | -8.4 $\pm$ 3.8   |
| 1295.264 | Boc-L-Phe | Acetic Acid                                   | phenylacetic acid                             | 321.2 | 7.5 $\pm$ 1.6    |
| 1295.265 | Boc-L-Phe | Cyclobutanecarboxylic Acid                    | phenylacetic acid                             | 361.2 | 53.1 $\pm$ 5.5   |
| 1295.266 | Boc-L-Phe | Cyclopentanecarboxylic Acid                   | phenylacetic acid                             | 375.2 | 99.6 $\pm$ 0.2   |
| 1295.267 | Boc-L-Phe | 3-Cyclopentylpropionic Acid                   | phenylacetic acid                             | 403.3 | 56.2 $\pm$ 9.5   |
| 1295.268 | Boc-L-Phe | Cyclohexanepropionic Acid                     | phenylacetic acid                             | 417.3 | 103.1 $\pm$ 0.2  |
| 1295.269 | Boc-L-Phe | 4-Methyl-1-Cyclohexanecarboxylic Acid         | phenylacetic acid                             | 403.3 | 104.2 $\pm$ 0.1  |
| 1295.270 | Boc-L-Phe | 2-Norbornaneacetic Acid                       | phenylacetic acid                             | 415.3 | 84.6 $\pm$ 8.0   |
| 1295.271 | Boc-L-Phe | 1-Adamantaneacetic Acid                       | phenylacetic acid                             | 455.3 | 36.0 $\pm$ 17.8  |
| 1295.272 | Boc-L-Phe | Phenylacetic Acid                             | 1-phenyl-1cyclopropanecarboxylic acid         | 423.2 | 96.0 $\pm$ 1.7   |
| 1295.273 | Boc-L-Phe | Phenylacetic Acid                             | 2-Phenylbutyric Acid                          | 425.3 | 104.4 $\pm$ 1.1  |
| 1295.274 | Boc-L-Phe | Phenylacetic Acid                             | 3-Phenylbutyric Acid                          | 425.3 | 104.9 $\pm$ 1.1  |
| 1295.275 | Boc-L-Phe | Phenylacetic Acid                             | m-Tolylacetic Acid                            | 411.2 | 60.7 $\pm$ 6.4   |
| 1295.276 | Boc-L-Phe | Phenylacetic Acid                             | 3-Fluorophenylacetic Acid                     | 415.2 | 104.2 $\pm$ 1.8  |
| 1295.277 | Boc-L-Phe | Phenylacetic Acid                             | 3-Bromophenylacetic Acid                      | 475.2 | 97.6 $\pm$ 2.7   |
| 1295.278 | Boc-L-Phe | Phenylacetic Acid                             | 4-Fluorophenylacetic Acid                     | 415.2 | 29.8 $\pm$ 16.2  |
| 1295.279 | Boc-L-Phe | Phenylacetic Acid                             | 3-Methoxyphenylacetic Acid                    | 427.2 | 75.2 $\pm$ 8.9   |
| 1295.280 | Boc-L-Phe | Phenylacetic Acid                             | 4-Bromophenylacetic Acid                      | 475.2 | 42.0 $\pm$ 6.0   |
| 1295.281 | Boc-L-Phe | Phenylacetic Acid                             | 4-Methoxyphenylacetic Acid                    | 427.2 | 52.6 $\pm$ 3.9   |
| 1295.282 | Boc-L-Phe | Phenylacetic Acid                             | 4-Ethoxyphenylacetic Acid                     | 441.2 | -2.3 $\pm$ 4.3   |
| 1295.283 | Boc-L-Phe | Phenylacetic Acid                             | 4-Isobutyl- $\alpha$ -Methylphenylacetic Acid | 467.3 | 58.6 $\pm$ 1.4   |

|          |           |                   |                                        |       |             |
|----------|-----------|-------------------|----------------------------------------|-------|-------------|
| 1295.284 | Boc-L-Phe | Phenylacetic Acid | 3-(3,4-Dimethoxyphenyl)-Propionic Acid | 471.3 | 34.0 ± 5.0  |
| 1295.285 | Boc-L-Phe | Phenylacetic Acid | 4-Biphenylacetic Acid                  | 473.3 | 11.1 ± 1.0  |
| 1295.286 | Boc-L-Phe | Phenylacetic Acid | 2-(Trifluoromethyl)-cinnamic Acid      | 477.2 | 91.9 ± 0.9  |
| 1295.287 | Boc-L-Phe | Phenylacetic Acid | (3,4-Dimethoxyphenyl) Acetic Acid      | 457.2 | 54.7 ± 1.2  |
| 1295.288 | Boc-L-Phe | Phenylacetic Acid | m-toluic acid                          | 397.2 | 59.9 ± 2.5  |
| 1295.289 | Boc-L-Phe | Phenylacetic Acid | Hydrocinnamic Acid                     | 411.2 | 83.1 ± 6.9  |
| 1295.290 | Boc-L-Phe | Phenylacetic Acid | 4-phenylbutyric acid                   | 425.3 | 60.2 ± 7.8  |
| 1295.291 | Boc-L-Phe | Phenylacetic Acid | phenylacetic acid                      | 397.2 | 5.6 ± 0.7   |
| 1295.292 | Boc-L-Phe | Phenylacetic Acid | 4-Ethyl-4-Biphenylcarboxylic Acid      | 487.3 | 48.3 ± 2.5  |
| 1295.293 | Boc-L-Phe | Phenylacetic Acid | Butyric Acid                           | 349.2 | 37.4 ± 0.8  |
| 1295.294 | Boc-L-Phe | Phenylacetic Acid | Heptanoic Acid                         | 391.3 | 44.3 ± 0.4  |
| 1295.295 | Boc-L-Phe | Phenylacetic Acid | Isobutyric Acid                        | 349.2 | 31.3 ± 4.6  |
| 1295.296 | Boc-L-Phe | Phenylacetic Acid | (+/-)-2-Methylbutyric Acid             | 363.2 | 41.7 ± 1.5  |
| 1295.297 | Boc-L-Phe | Phenylacetic Acid | 4-Methylvaleric Acid                   | 377.3 | 62.2 ± 3.6  |
| 1295.298 | Boc-L-Phe | Phenylacetic Acid | Trimethylacetic Acid                   | 363.2 | 94.7 ± 1.6  |
| 1295.299 | Boc-L-Phe | Phenylacetic Acid | Cyclohexylacetic Acid                  | 403.3 | 89.6 ± 1.1  |
| 1295.300 | Boc-L-Phe | Phenylacetic Acid | Cyclohexanebutyric Acid                | 431.3 | 82.8 ± 5.4  |
| 1295.301 | Boc-L-Phe | Phenylacetic Acid | Acetic Acid                            | 321.2 | 15.4 ± 1.7  |
| 1295.302 | Boc-L-Phe | Phenylacetic Acid | Cyclobutanecarboxylic Acid             | 361.2 | 24.7 ± 0.1  |
| 1295.303 | Boc-L-Phe | Phenylacetic Acid | Cyclopentanecarboxylic Acid            | 375.2 | 3.3 ± 2.0   |
| 1295.304 | Boc-L-Phe | Phenylacetic Acid | 3-Cyclopentylpropionic Acid            | 403.3 | 45.5 ± 2.6  |
| 1295.305 | Boc-L-Phe | Phenylacetic Acid | Cyclohexanepropionic Acid              | 417.3 | 82.8 ± 1.8  |
| 1295.306 | Boc-L-Phe | Phenylacetic Acid | 4-Methyl-1-Cyclohexanecarboxylic Acid  | 403.3 | 97.8 ± 1.3  |
| 1295.307 | Boc-L-Phe | Phenylacetic Acid | 2-Norbornaneacetic Acid                | 415.3 | 100.6 ± 0.3 |

**Table S3:** Building blocks used for the preparation of individual compounds **2520**

| Bag # | Building block used for R1 | Building block used for R2 | Building block used for R3  |
|-------|----------------------------|----------------------------|-----------------------------|
| 1     | Boc-Ala(2-naphtyl)-OH      | 3-PhenylButyric Acid       | 2-cyclopentylpropionic acid |
| 2     | Boc-Ala(2-naphtyl)-OH      | 2-Norbornaneacetic acid    | 4-methoxyphenylacetic acid  |
| 3     | Boc-Ala(2-naphtyl)-OH      | cyclohexanecarboxylic acid | 2-phenylbutyric acid        |
| 4     | Boc-Ala(2-naphtyl)-OH      | 3-PhenylButyric Acid       | isobutyric acid             |
| 5     | Boc-Ala(2-naphtyl)-OH      | 2-Norbornaneacetic acid    | 2-cyclopentylpropionic acid |
| 6     | Boc-Ala(2-naphtyl)-OH      | cyclohexanecarboxylic acid | 4-methoxyphenylacetic acid  |
| 7     | Boc-Ala(2-naphtyl)-OH      | 3-PhenylButyric Acid       | 2-phenylbutyric acid        |
| 8     | Boc-Ala(2-naphtyl)-OH      | 2-Norbornaneacetic acid    | isobutyric acid             |
| 9     | Boc-Ala(2-naphtyl)-OH      | cyclohexanecarboxylic acid | 2-cyclopentylpropionic acid |
| 10    | Boc-Ala(2-naphtyl)-OH      | 3-PhenylButyric Acid       | 4-methoxyphenylacetic acid  |
| 11    | Boc-Ala(2-naphtyl)-OH      | 2-Norbornaneacetic acid    | 2-phenylbutyric acid        |
| 12    | Boc-Ala(2-naphtyl)-OH      | cyclohexanecarboxylic acid | isobutyric acid             |
| 13    | Boc-L-Isoluceine-OH        | 3-PhenylButyric Acid       | 2-cyclopentylpropionic acid |
| 14    | Boc-L-Isoluceine-OH        | 2-Norbornaneacetic acid    | 4-methoxyphenylacetic acid  |
| 15    | Boc-L-Isoluceine-OH        | cyclohexanecarboxylic acid | 2-phenylbutyric acid        |
| 16    | Boc-L-Isoluceine-OH        | 3-PhenylButyric Acid       | isobutyric acid             |



|    |                     |                            |                              |
|----|---------------------|----------------------------|------------------------------|
| 17 | Boc-L-Isoluceine-OH | 2-Norbaneacetic acid       | 2-cyclopentylpropioinic acid |
| 18 | Boc-L-Isoluceine-OH | cyclohexanecarboxylic acid | 4-methoxyphenylacetic acid   |
| 19 | Boc-L-Isoluceine-OH | 3-PhenylButyric Acid       | 2-phenylbutyric acid         |
| 20 | Boc-L-Isoluceine-OH | 2-Norbaneacetic acid       | isobutyric acid              |
| 21 | Boc-L-Isoluceine-OH | cyclohexanecarboxylic acid | 2-cyclopentylpropioinic acid |
| 22 | Boc-L-Isoluceine-OH | 3-PhenylButyric Acid       | 4-methoxyphenylacetic acid   |
| 23 | Boc-L-Isoluceine-OH | 2-Norbaneacetic acid       | 2-phenylbutyric acid         |
| 24 | Boc-L-Isoluceine-OH | cyclohexanecarboxylic acid | isobutyric acid              |
| 25 | Boc-L-Phe-OH        | 3-PhenylButyric Acid       | 2-cyclopentylpropioinic acid |
| 26 | Boc-L-Phe-OH        | 2-Norbaneacetic acid       | 4-methoxyphenylacetic acid   |
| 27 | Boc-L-Phe-OH        | cyclohexanecarboxylic acid | 2-phenylbutyric acid         |
| 28 | Boc-L-Phe-OH        | 3-PhenylButyric Acid       | isobutyric acid              |
| 29 | Boc-L-Phe-OH        | 2-Norbaneacetic acid       | 2-cyclopentylpropioinic acid |
| 30 | Boc-L-Phe-OH        | cyclohexanecarboxylic acid | 4-methoxyphenylacetic acid   |
| 31 | Boc-L-Phe-OH        | 3-PhenylButyric Acid       | 2-phenylbutyric acid         |
| 32 | Boc-L-Phe-OH        | 2-Norbaneacetic acid       | isobutyric acid              |
| 33 | Boc-L-Phe-OH        | cyclohexanecarboxylic acid | 2-cyclopentylpropioinic acid |
| 34 | Boc-L-Phe-OH        | 3-PhenylButyric Acid       | 4-methoxyphenylacetic acid   |
| 35 | Boc-L-Phe-OH        | 2-Norbaneacetic acid       | 2-phenylbutyric acid         |
| 36 | Boc-L-Phe-OH        | cyclohexanecarboxylic acid | isobutyric acid              |
| 37 | Boc-L-Tyr(Et)-OH    | 3-PhenylButyric Acid       | 2-cyclopentylpropioinic acid |
| 38 | Boc-L-Tyr(Et)-OH    | 2-Norbaneacetic acid       | 4-methoxyphenylacetic acid   |
| 39 | Boc-L-Tyr(Et)-OH    | cyclohexanecarboxylic acid | 2-phenylbutyric acid         |
| 40 | Boc-L-Tyr(Et)-OH    | 3-PhenylButyric Acid       | isobutyric acid              |
| 41 | Boc-L-Tyr(Et)-OH    | 2-Norbaneacetic acid       | 2-cyclopentylpropioinic acid |
| 42 | Boc-L-Tyr(Et)-OH    | cyclohexanecarboxylic acid | 4-methoxyphenylacetic acid   |
| 43 | Boc-L-Tyr(Et)-OH    | 3-PhenylButyric Acid       | 2-phenylbutyric acid         |
| 44 | Boc-L-Tyr(Et)-OH    | 2-Norbaneacetic acid       | isobutyric acid              |
| 45 | Boc-L-Tyr(Et)-OH    | cyclohexanecarboxylic acid | 2-cyclopentylpropioinic acid |
| 46 | Boc-L-Tyr(Et)-OH    | 3-PhenylButyric Acid       | 4-methoxyphenylacetic acid   |
| 47 | Boc-L-Tyr(Et)-OH    | 2-Norbaneacetic acid       | 2-phenylbutyric acid         |
| 48 | Boc-L-Tyr(Et)-OH    | cyclohexanecarboxylic acid | isobutyric acid              |

#### Activity of Library 2520: deconvolution of FIU-1295

| % Inhibition  |              | IC <sub>50</sub> (μM, N=4) |          |           |
|---------------|--------------|----------------------------|----------|-----------|
| at 4 μM (N=3) |              | ROR-Gamma                  | ROR-Beta | ROR-Alpha |
| 2520.01       | 40.6 ± 7.4   |                            |          |           |
| 2520.02       | -33.8 ± 2.8  |                            |          |           |
| 2520.03       | -31.8 ± 7.3  |                            |          |           |
| 2520.04       | -40.8 ± 1.1  |                            |          |           |
| 2520.05       | 43.1 ± 11.1  |                            |          |           |
| 2520.06       | -56.4 ± 1.5  |                            |          |           |
| 2520.07       | -32.2 ± 14.0 |                            |          |           |
| 2520.08       | -23.6 ± 11.3 |                            |          |           |
| 2520.09       | -25.4 ± 11.4 |                            |          |           |
| 2520.10       | -7.3 ± 1.8   |                            |          |           |

|         |              |            |            |            |
|---------|--------------|------------|------------|------------|
| 2520.11 | 67.6 ± 3.3   | 7.55 ± 0.5 | 7.3 ± 0.8  | 10.3 ± 0.4 |
| 2520.12 | 30.4 ± 4.0   |            |            |            |
| 2520.13 | 8.8 ± 0.7    |            |            |            |
| 2520.14 | 43.0 ± 6.2   |            |            |            |
| 2520.15 | 43.6 ± 11.4  | 4.69 ± 0.2 | 3.66 ± 0.3 | 5.97 ± 0.2 |
| 2520.16 | 7.1 ± 16.3   |            |            |            |
| 2520.17 | 31.7 ± 0.7   |            |            |            |
| 2520.18 | 26.2 ± 4.1   |            |            |            |
| 2520.19 | 75.9 ± 8.9   | 5.07 ± 0.3 | 4.87 ± 0.3 | 6.74 ± 0.3 |
| 2520.20 | 13.3 ± 10.4  |            |            |            |
| 2520.21 | 37.9 ± 5.2   |            |            |            |
| 2520.22 | 10.1 ± 13.3  |            |            |            |
| 2520.23 | 35.9 ± 13.1  |            |            |            |
| 2520.24 | -23.6 ± 2.6  |            |            |            |
| 2520.25 | -6.3 ± 2.8   |            |            |            |
| 2520.26 | 40.8 ± 1.1   |            |            |            |
| 2520.27 | 97.7 ± 1.3   | 4.8 ± 0.2  | 4.89 ± 0.3 | 6.61 ± 0.3 |
| 2520.28 | 69.8 ± 1.9   | 6.37 ± 0.4 | 6.17 ± 0.3 | 8.48 ± 0.4 |
| 2520.29 | 45.8 ± 9.4   |            |            |            |
| 2520.30 | -4.8 ± 8.8   |            |            |            |
| 2520.31 | 70.5 ± 9.2   | 3.95 ± 0.3 | 5.5 ± 0.3  | 6.82 ± 0.4 |
| 2520.32 | 36.0 ± 17.5  |            |            |            |
| 2520.33 | 61.1 ± 4.9   | 6.27 ± 0.3 | 6.19 ± 0.4 | 7.27 ± 0.3 |
| 2520.34 | 34.4 ± 6.2   |            |            |            |
| 2520.35 | -21.7 ± 6.6  |            |            |            |
| 2520.36 | -5.4 ± 5.2   |            |            |            |
| 2520.37 | -37.4 ± 18.9 |            |            |            |
| 2520.38 | -22.6 ± 11.9 |            |            |            |
| 2520.39 | 73.2 ± 3.0   | 4.36 ± 0.2 | 5.34 ± 0.4 | 6.36 ± 0.3 |
| 2520.40 | -8.1 ± 6.6   |            |            |            |
| 2520.41 | -13.4 ± 7.7  |            |            |            |
| 2520.42 | 96.5 ± 0.9   | 5.17 ± 0.8 | 5.21 ± 0.3 | 5.4 ± 0.4  |
| 2520.43 | -5.4 ± 2.1   |            |            |            |
| 2520.44 | -20.0 ± 9.6  |            |            |            |
| 2520.45 | 67.6 ± 8.3   | 5.33 ± 0.2 | 5.51 ± 0.3 | 5.86 ± 0.3 |
| 2520.46 | 67.3 ± 2.9   | 5.31 ± 0.2 | 5.46 ± 0.3 | 5.82 ± 0.3 |
| 2520.47 | 51.3 ± 9.7   | 4.68 ± 0.2 | 6.67 ± 0.4 | 7.20 ± 0.4 |
| 2520.48 | 69.2 ± 32.0  | 9.27 ± 0.4 | 6.57 ± 0.5 | 9.61 ± 0.5 |

RT: 0.01 - 6.02

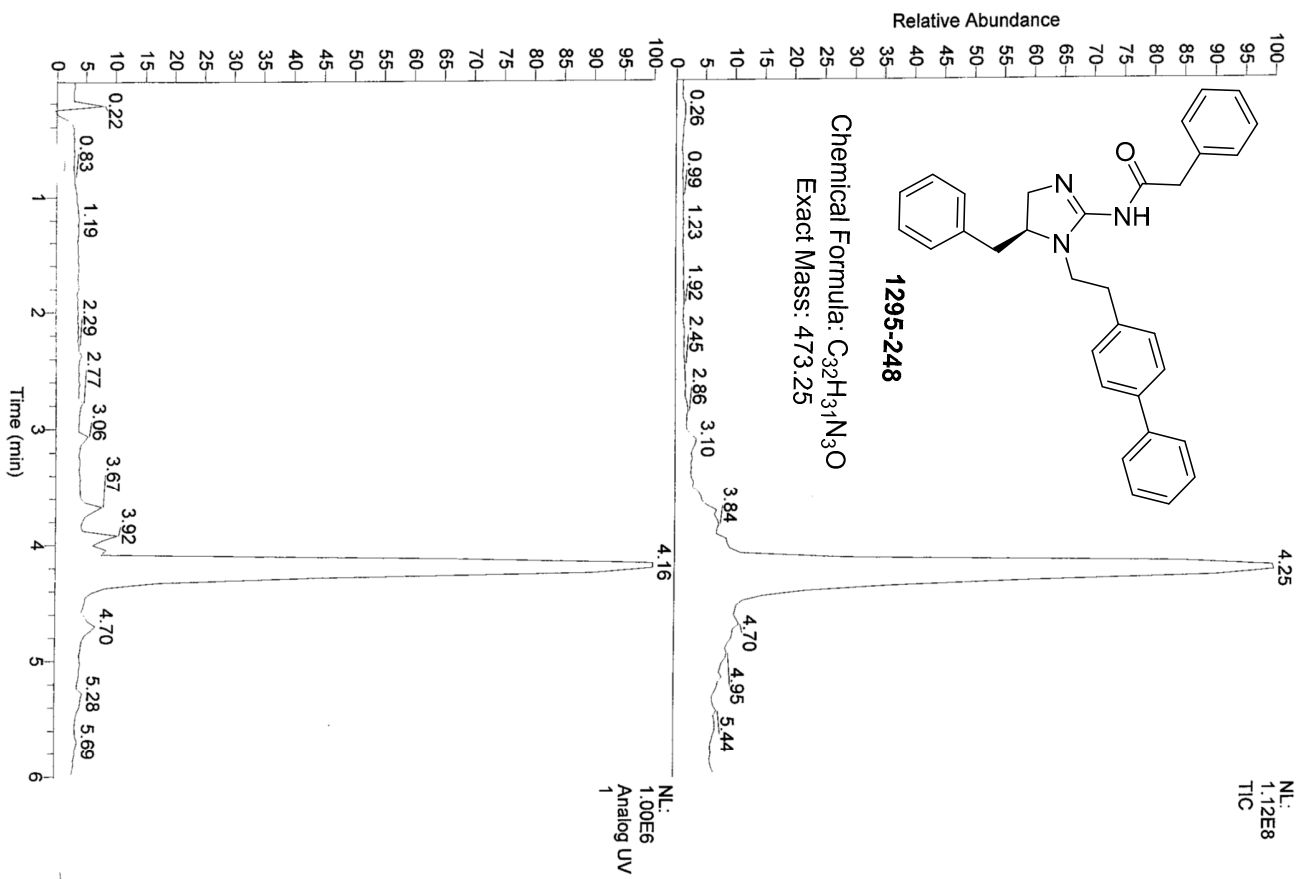

Experiment Method:  
C:\LCQ\Methods\ESI\Short-col\ESI5-95m8 Created: 11/11/97  
Creator: LCQ  
Administrator  
Summary: 5-95m8  
MS Run Time (min): 6.00  
Last modified: 3/2/01 by

Autosampler Settings:

S#: 88-113 RT: 3.55-4.58 AV: 26 NL: 1.77E7  
T: + c Full ms [50.00 - 2000.00]

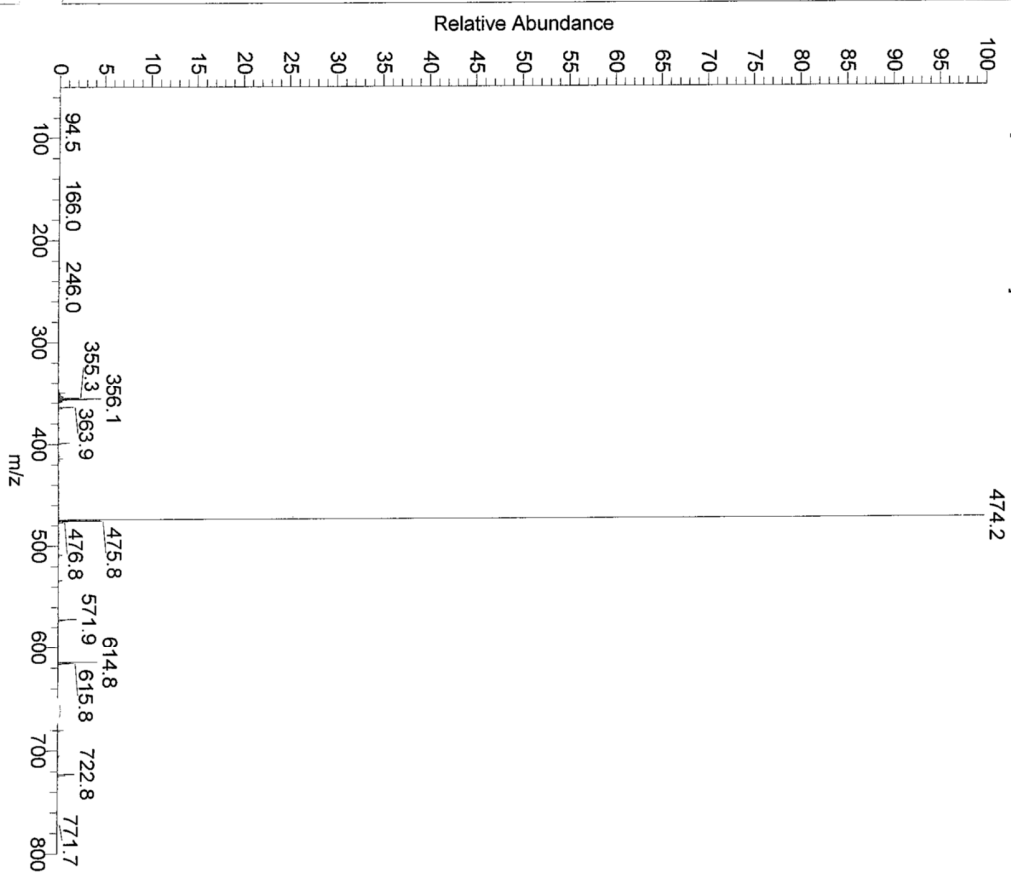

RT: 0.01 - 6.01

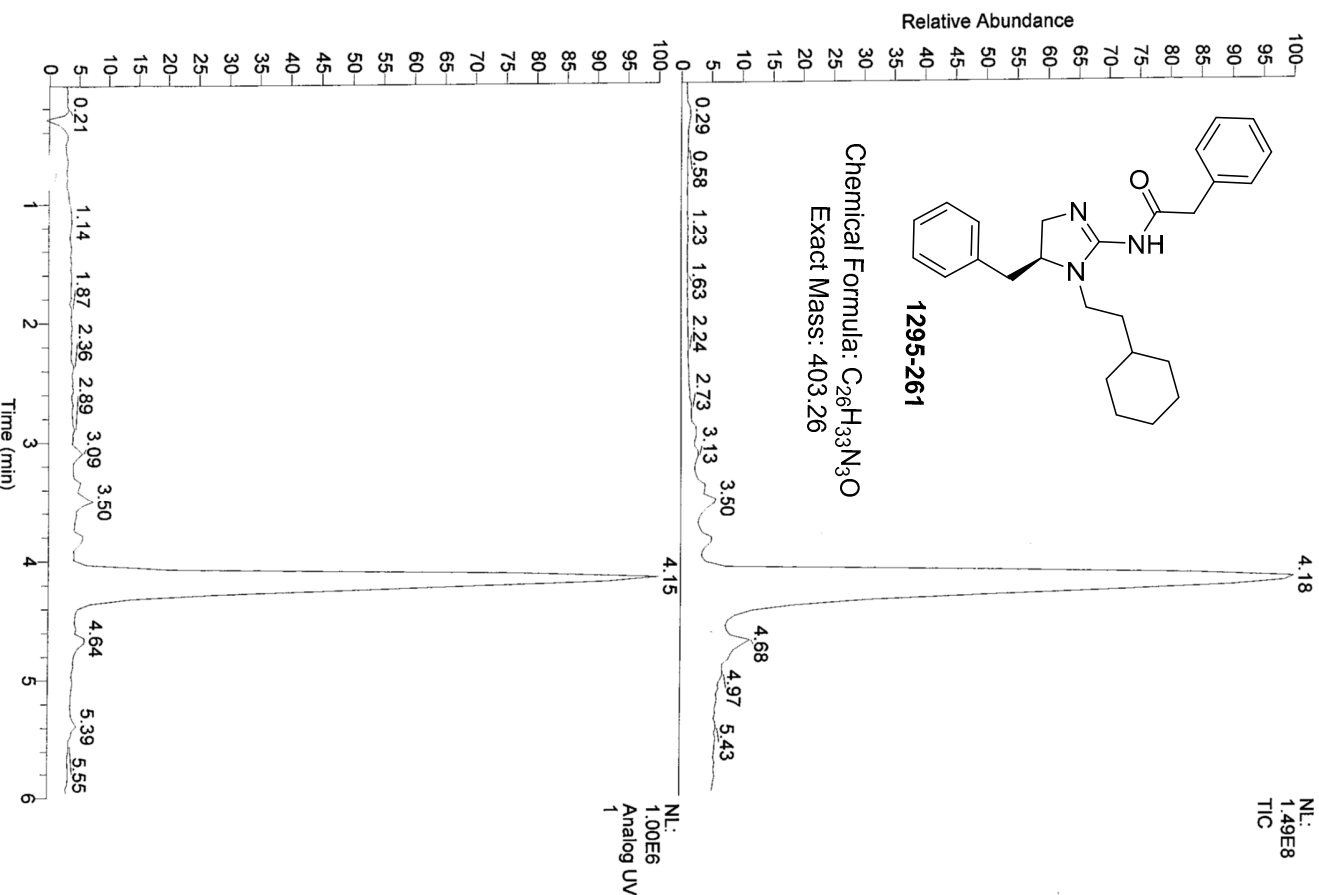

Experiment Method:  
C:\LCQ\Methods\ESI\Short-col\ESI5-95m8 Created: 11/11/97  
Creator: LCQ  
Administrator  
Summary: 5-95m8  
MS Run Time (min): 6.00  
Last modified: 3/3/01 by

Autosampler Settings:

S#: 87-122 RT: 3.50-4.89 AV: 36 NL: 2.00E7  
T: + c Full ms [50.00 - 2000.00]

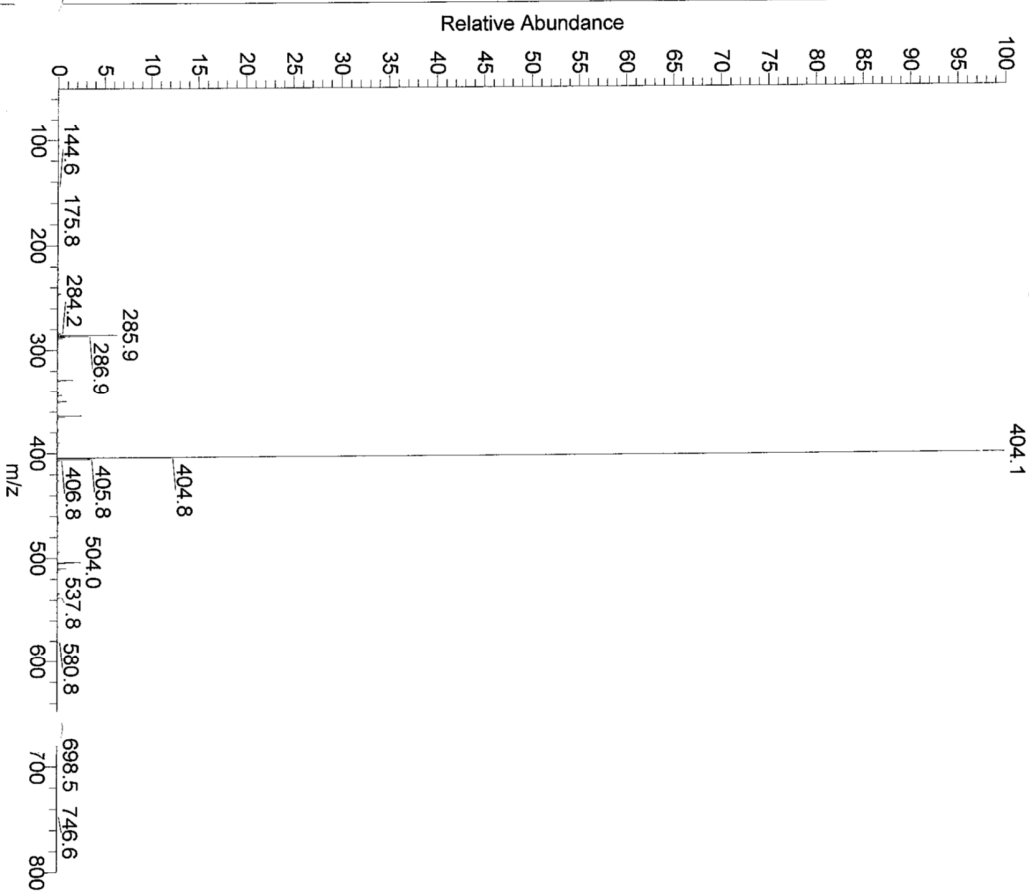

RT: 0.01 - 6.04

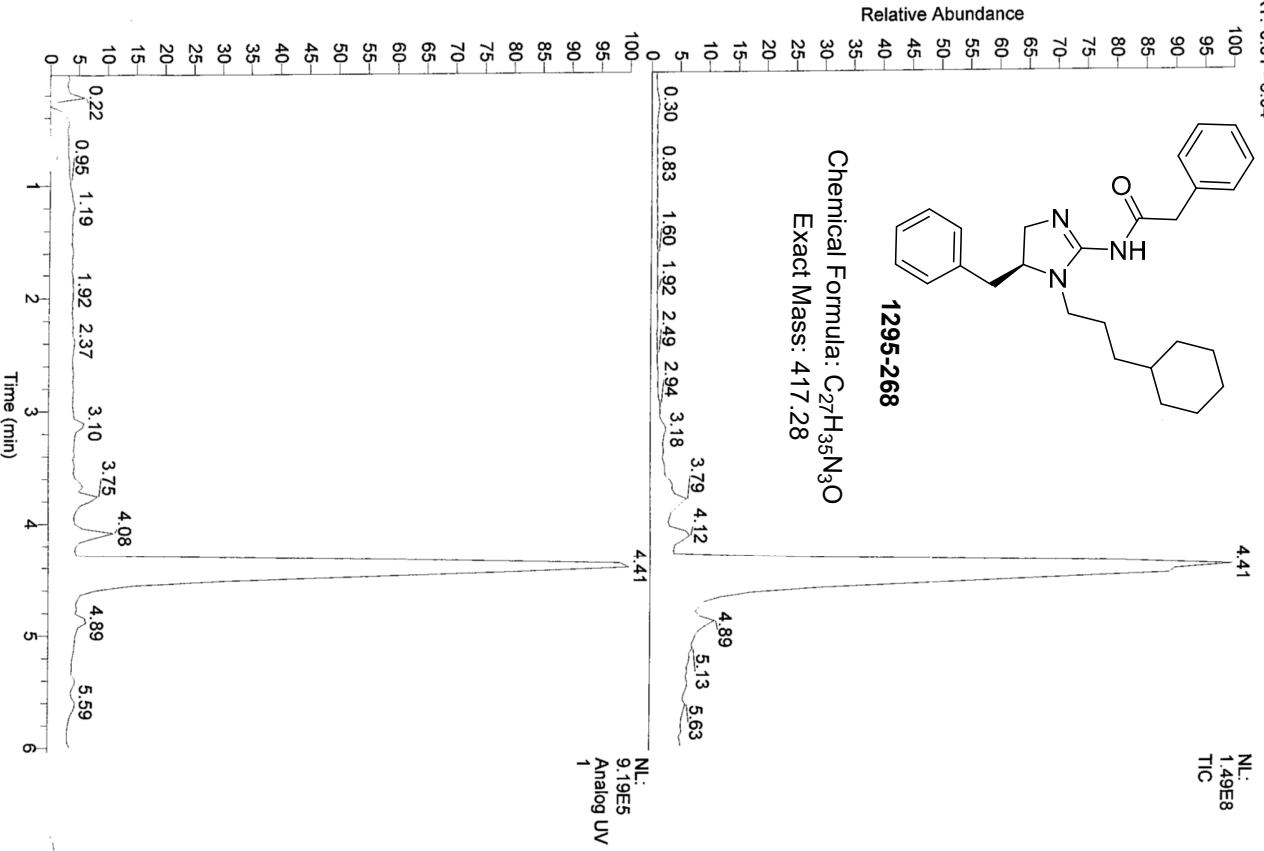

Experiment Method:

C:\LCQ\Methods\ESI\short-col\ESI5-95m8 Created: 11/11/97

Creator: LCQ

Last modified: 3/3/01 by

Administrator

Summary: 5-95m8

MS Run Time (min): 6.00

Autosampler Settings:

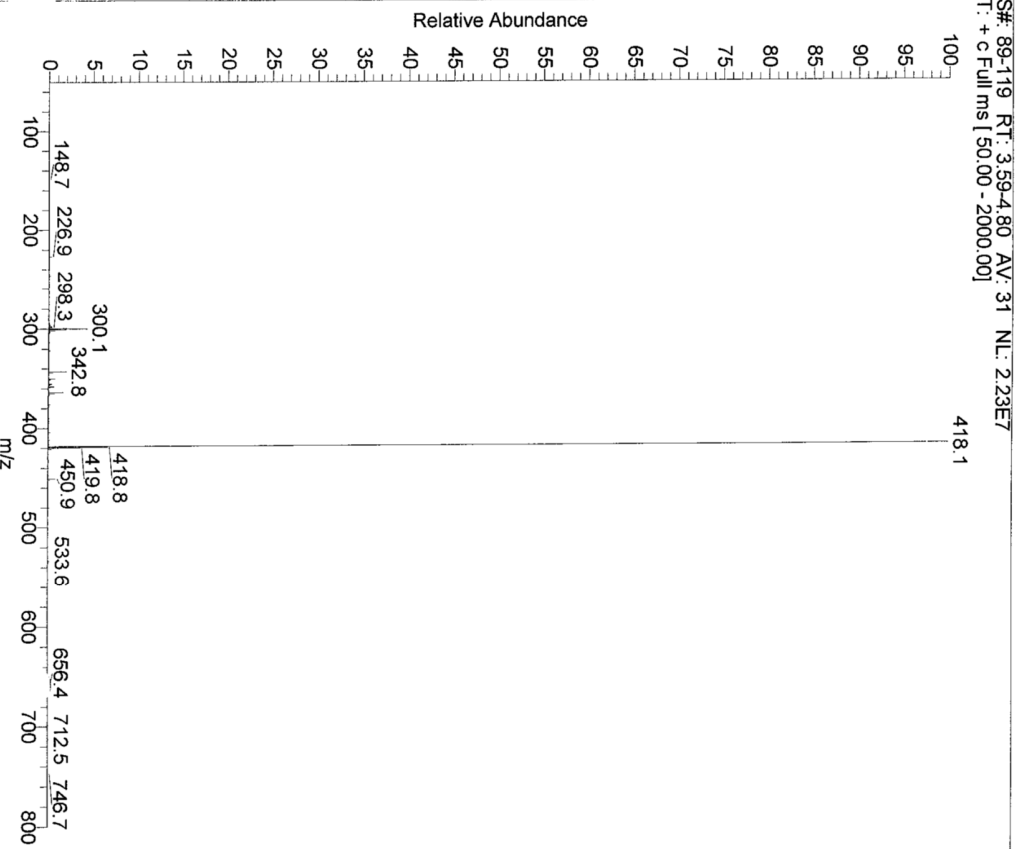

RT: 0.01 - 6.02

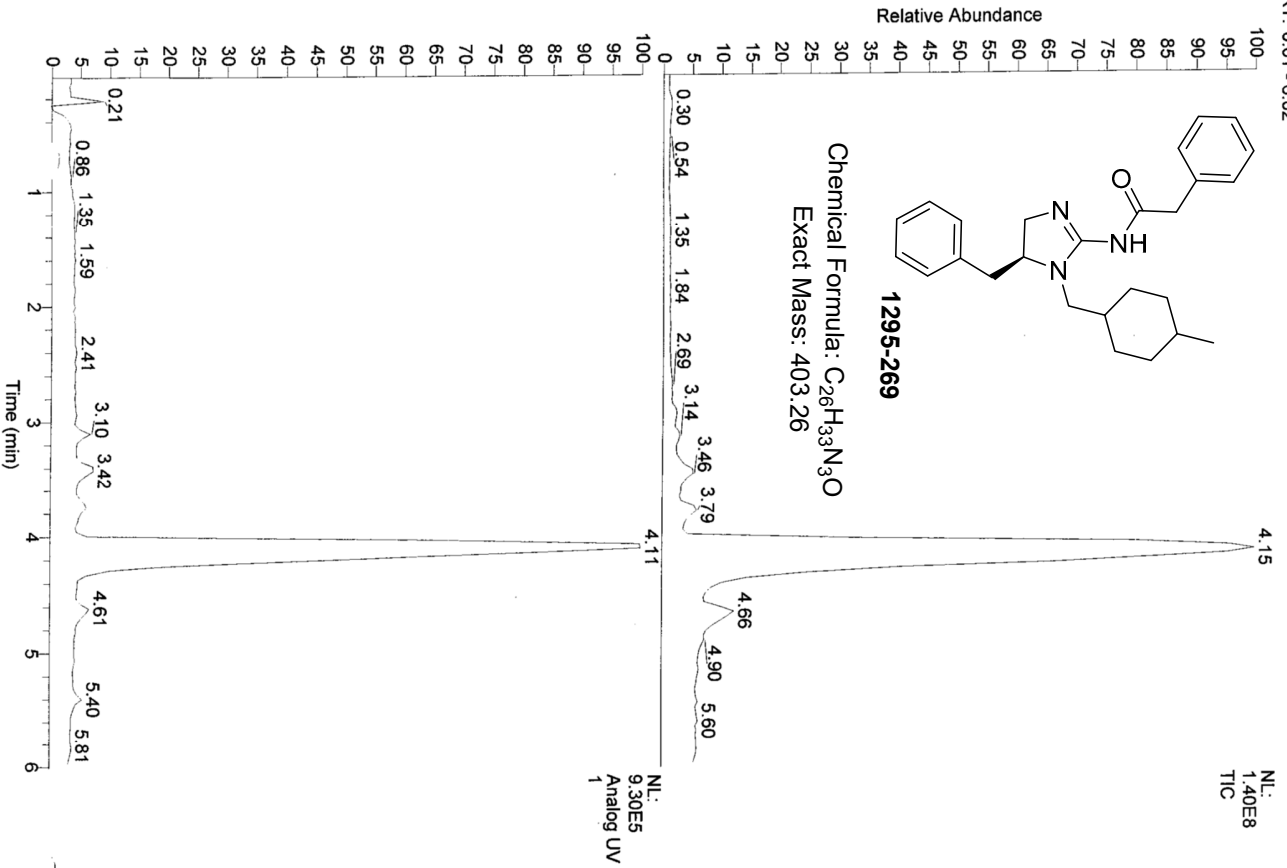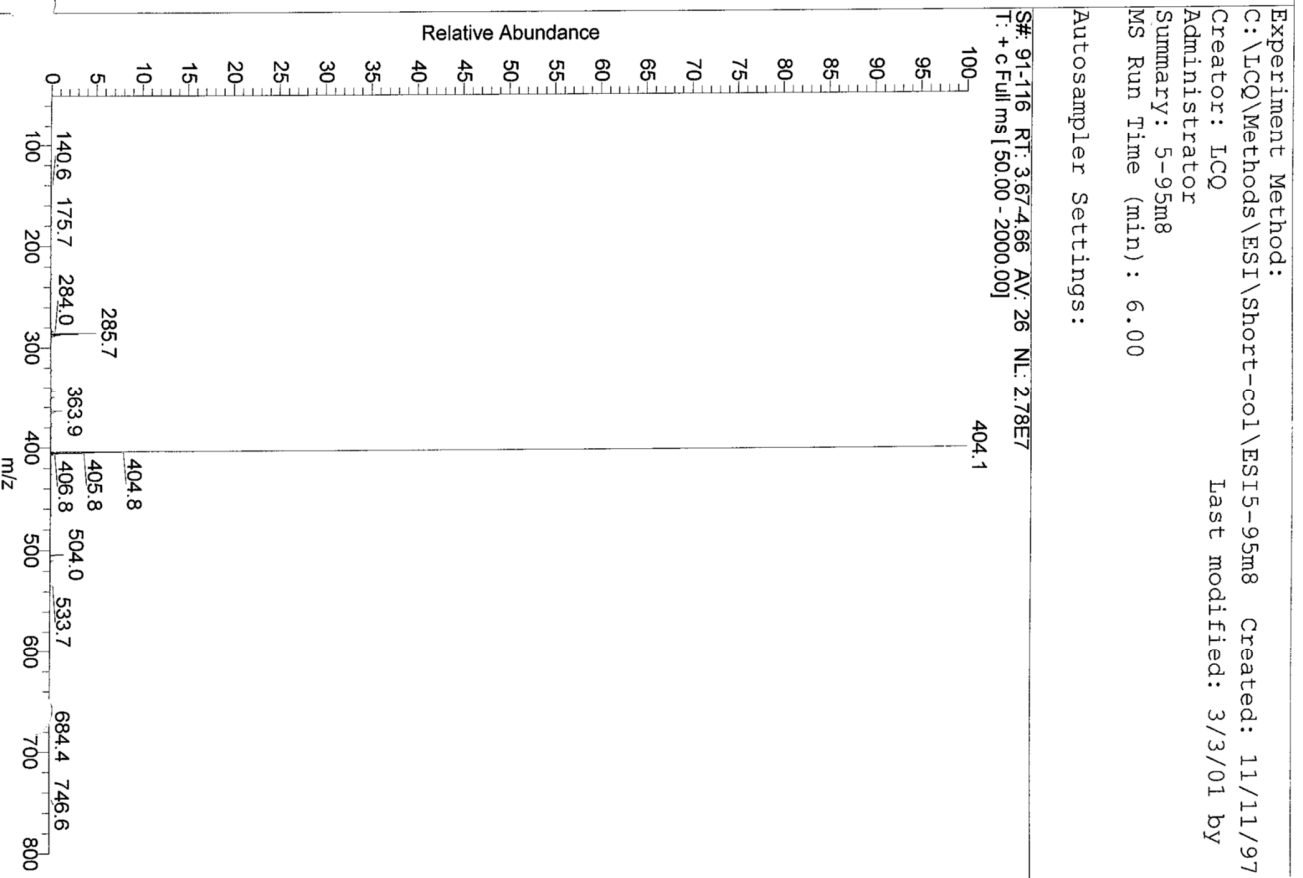

RT: 0.01 - 6.04

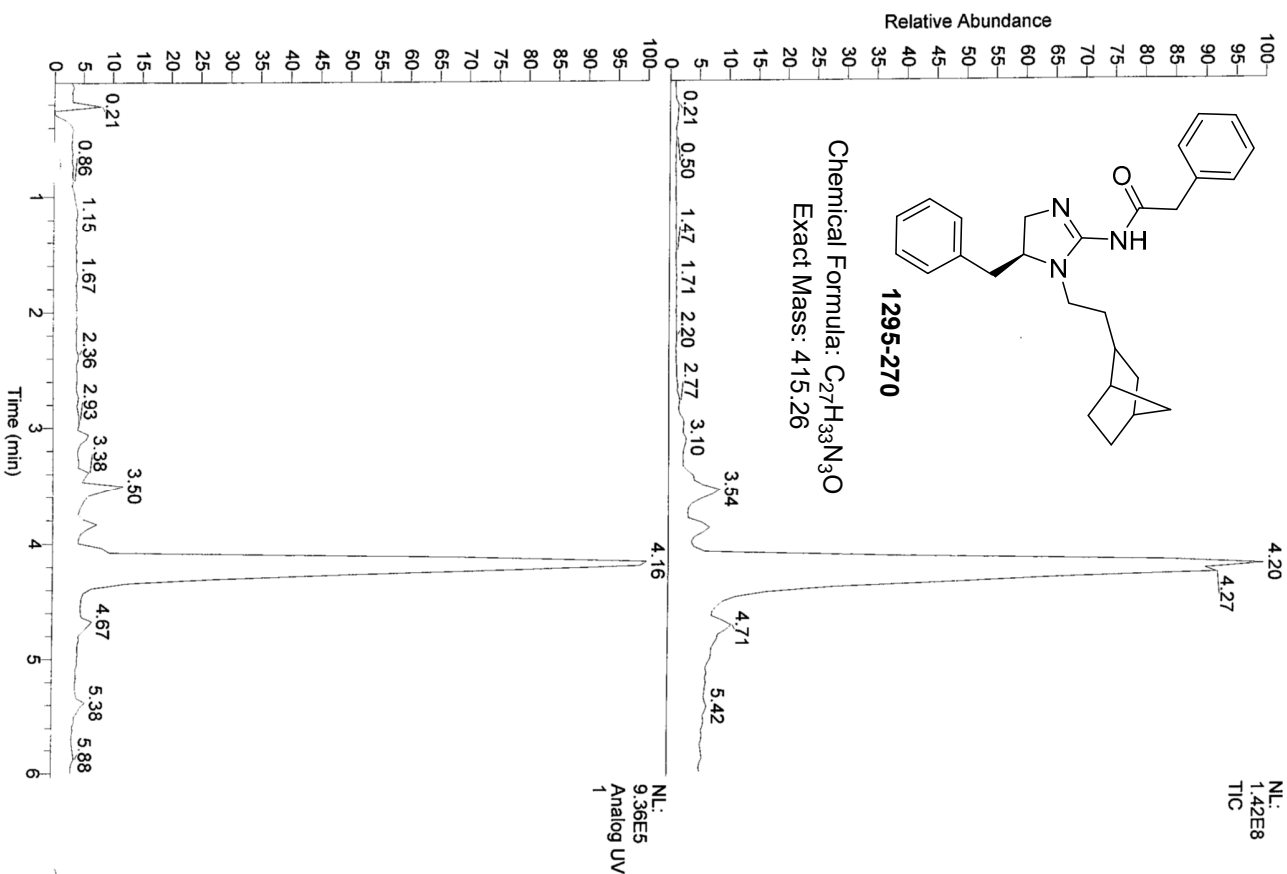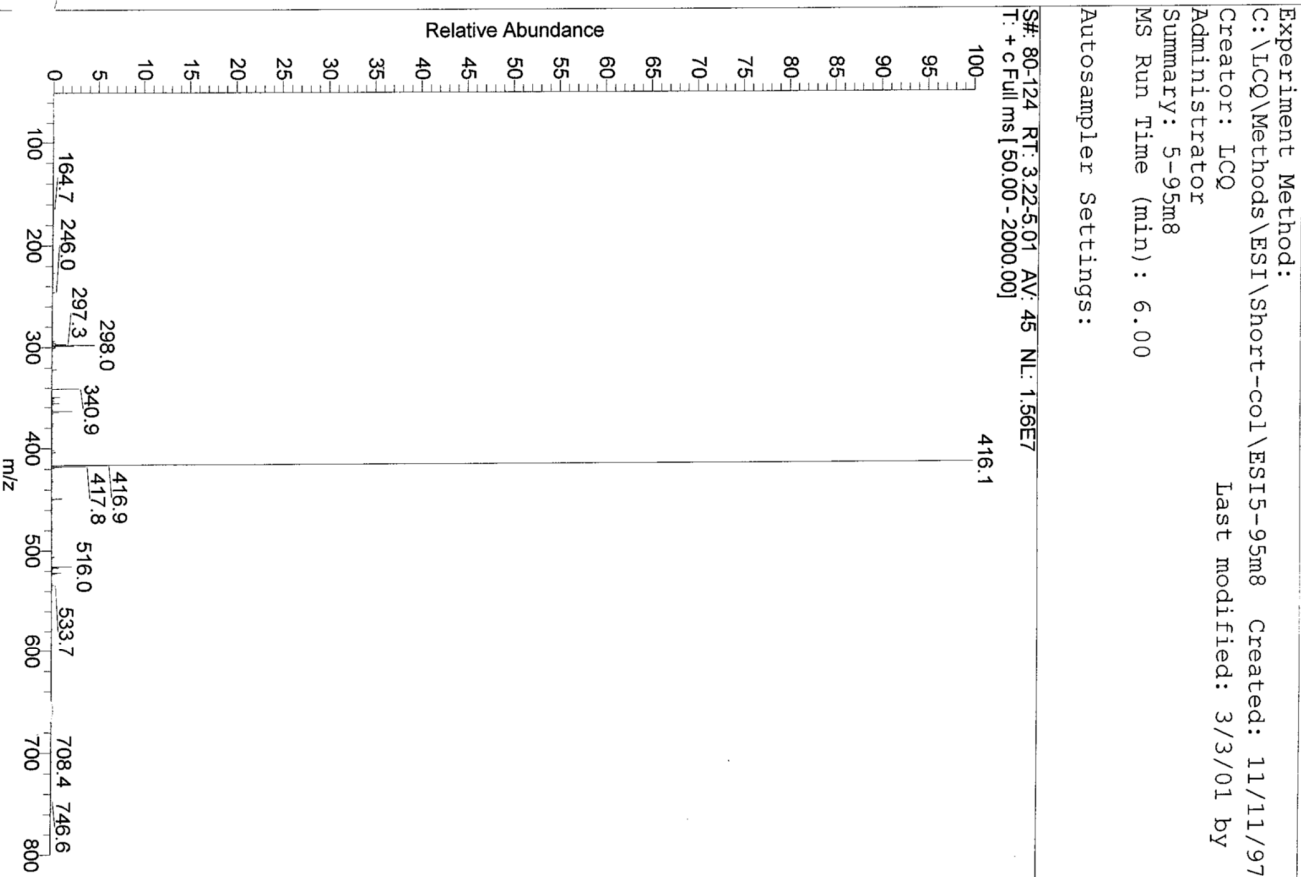

RT: 0.01 - 6.01

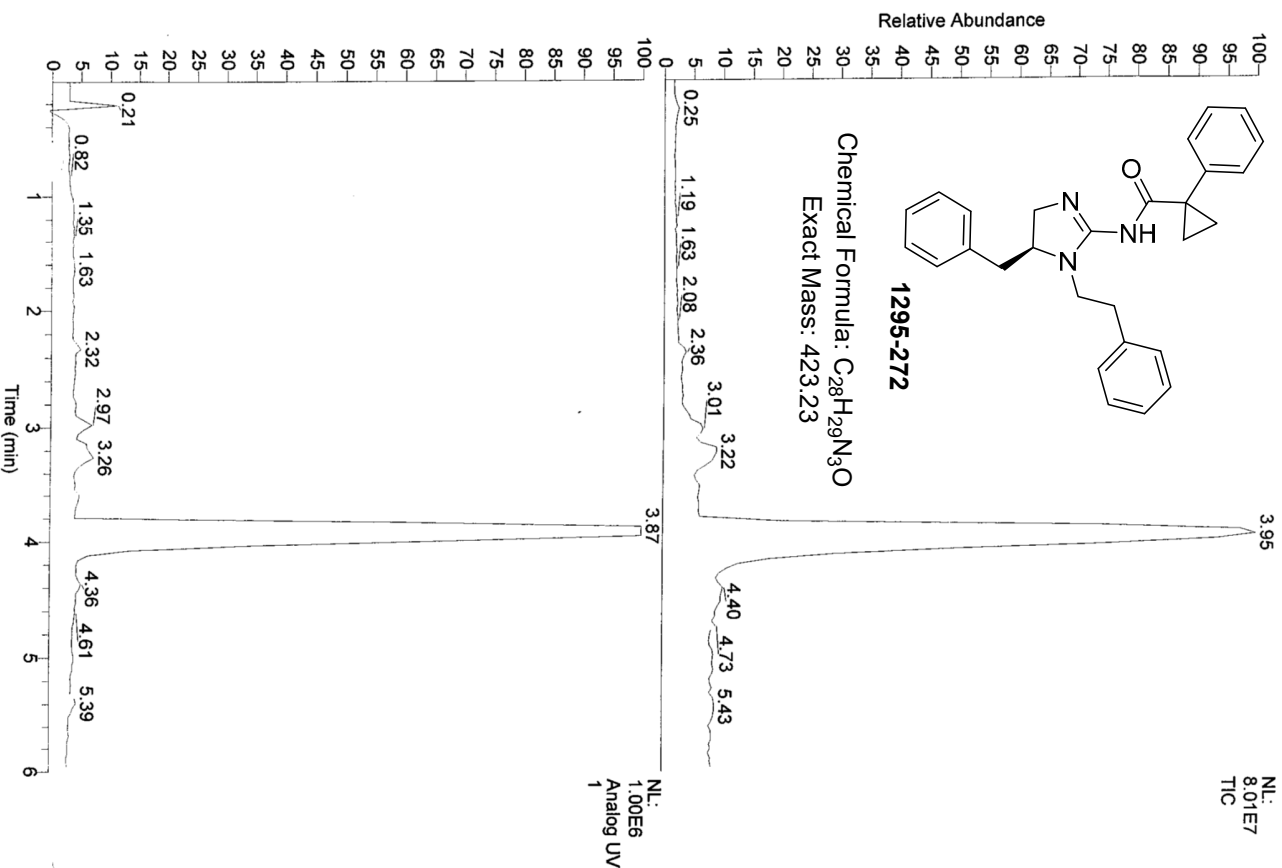

Experiment Method:

C:\LCQ\Methods\ESI\Short-col\ESI5-95m8 Created: 11/11/97  
Last modified: 3/3/01 by

Creator: LCQ

Administrator

Summary: 5-95m8

MS Run Time (min): 6.00

Autosampler Settings:

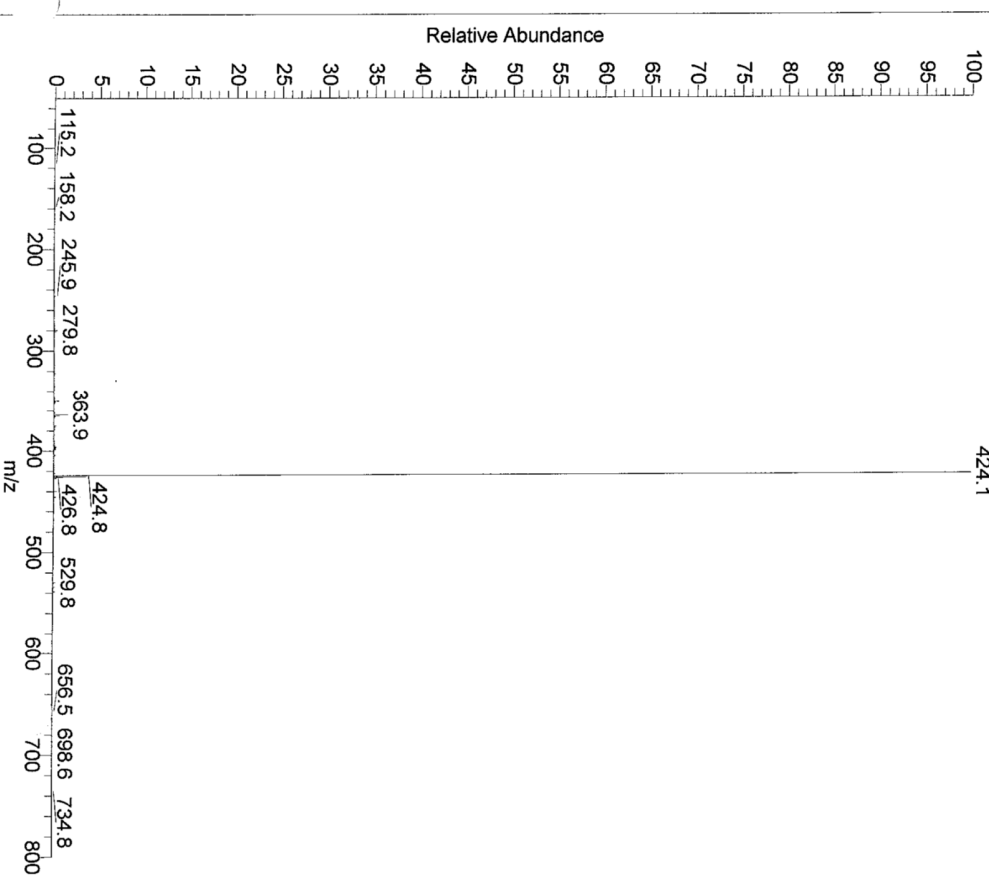



RT: 0.02 - 6.00

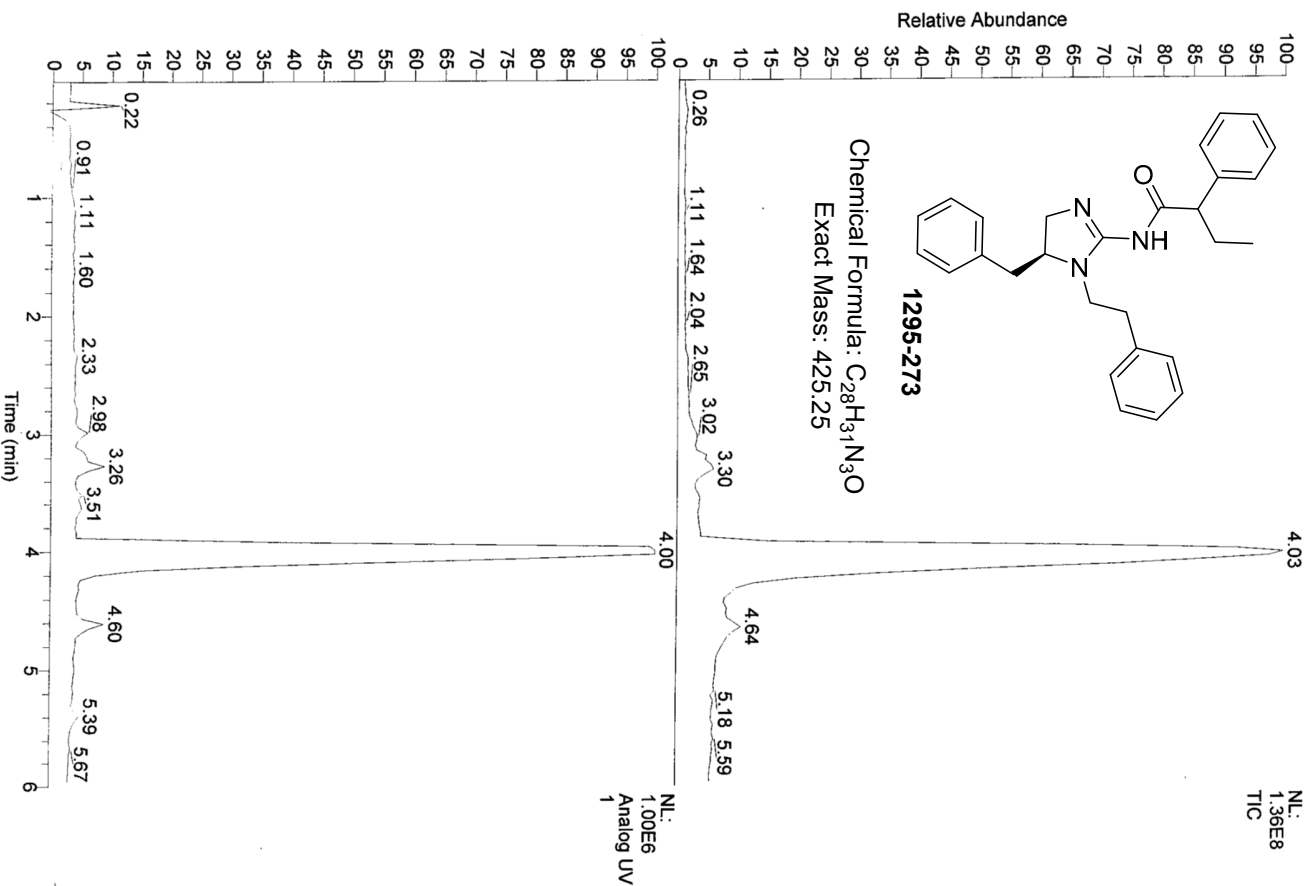

Experiment Method:  
C:\LCQ\Methods\ESI\Short-col\ESI5-95m8 Created: 11/11/97  
Creator: LCQ  
Administrator  
Summary: 5-95m8  
MS Run Time (min): 6.00  
Last modified: 3/3/01 by

Autosampler Settings:

Sample: 92-111 RT: 3.71-4.44 AV: 20 NL: 3.37E7  
T: + c Full ms [50.00 - 2000.00]

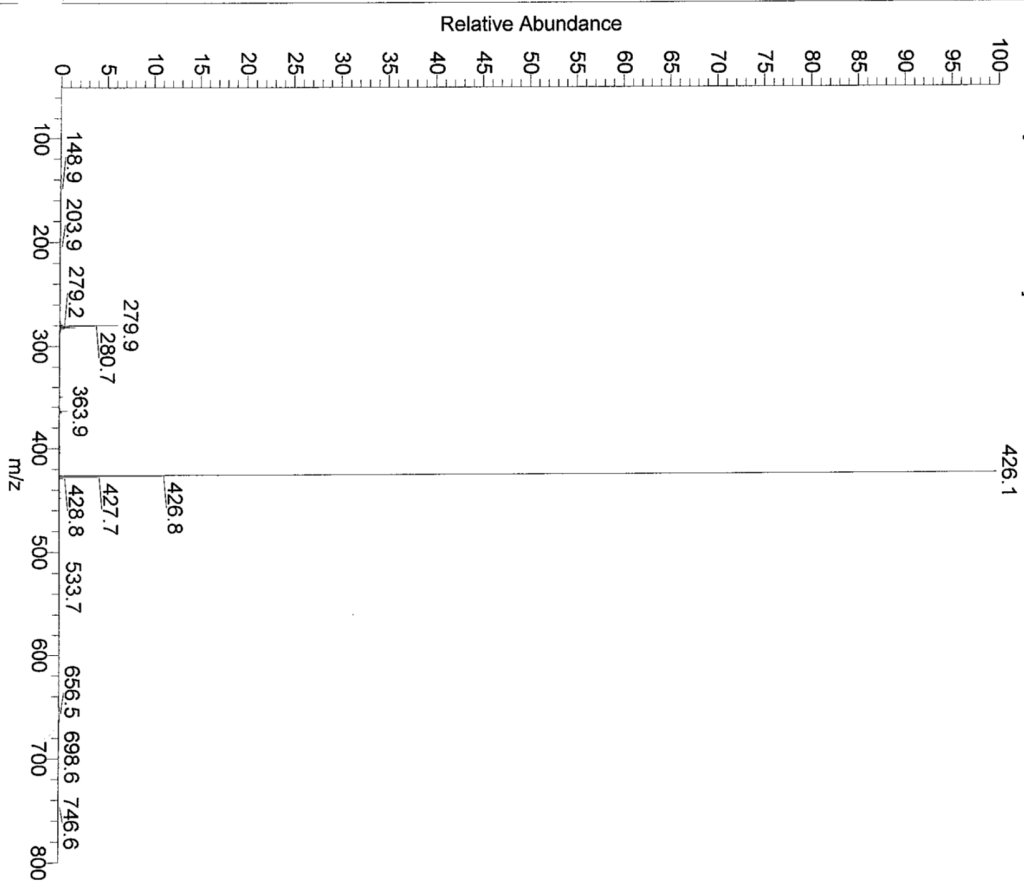

RT: 0.01 - 6.03

NL:  
1.38E8  
TIC

Experiment Method:  
C:\LCQ\Methods\ESI\Short-col\ESI5-95m8 Created: 11/11/97  
Creator: LCQ  
Administrator  
Summary: 5-95m8  
MS Run Time (min): 6.00  
Last modified: 3/3/01 by

Autosampler Settings:

Sample: 88-107 RT: 3.55-4.26 AV: 20 NL: 3.31E7  
T: + c Full ms [50.00 - 2000.00]

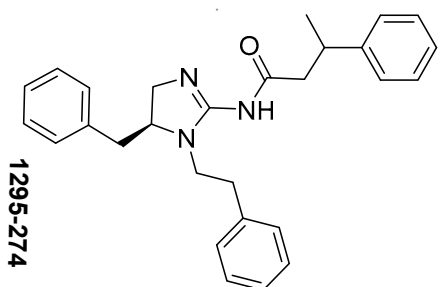

Chemical Formula:  $C_{28}H_{31}N_3O$   
Exact Mass: 425.25

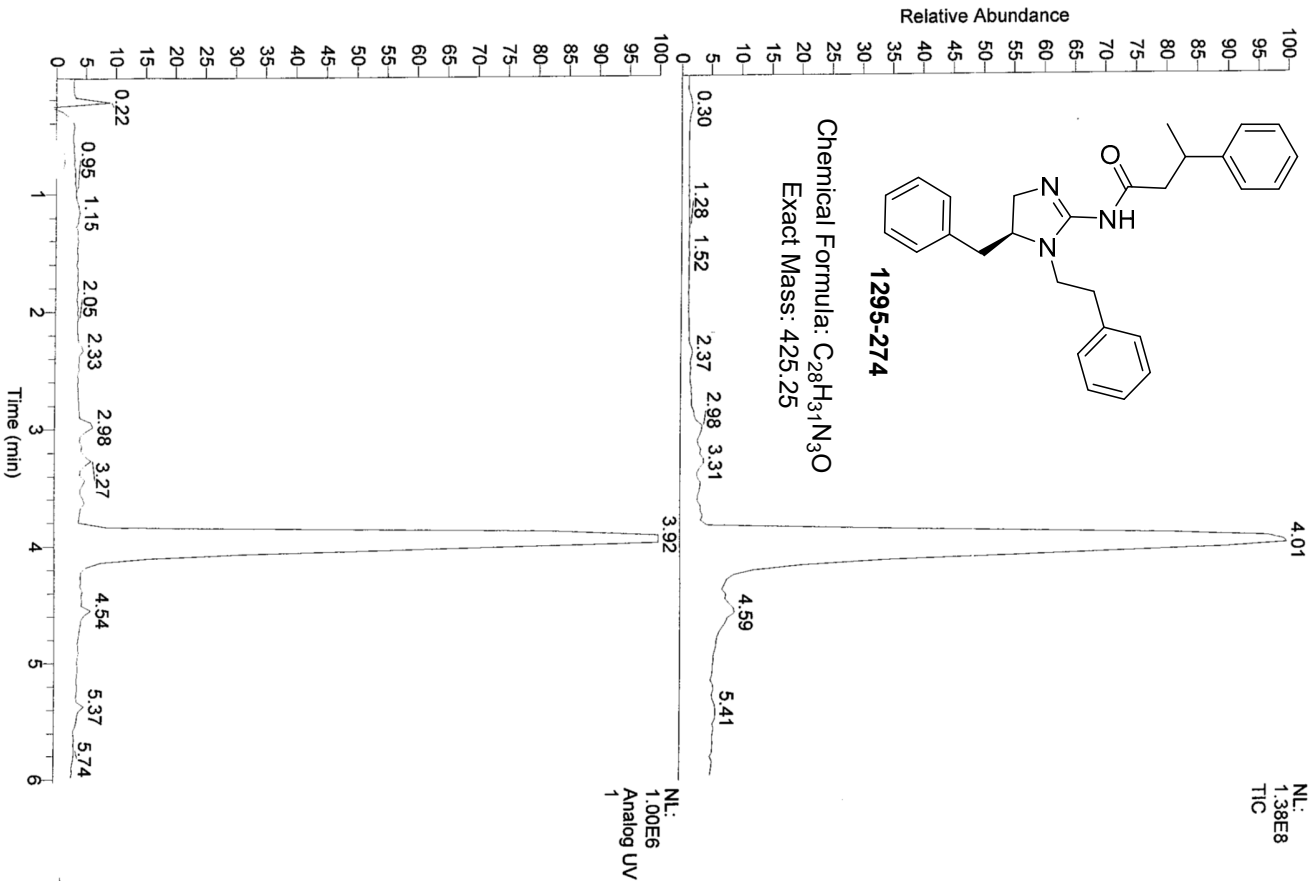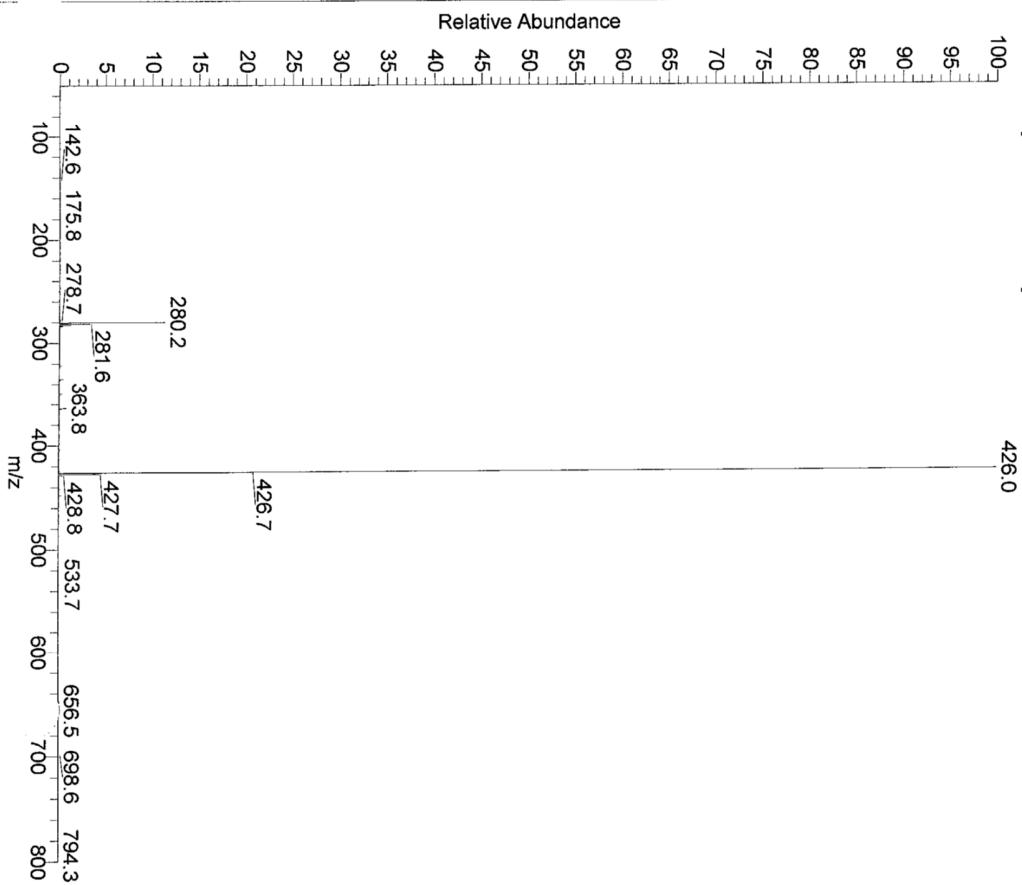

RT: 0.01 - 6.03

NL:  
131E8  
TIC

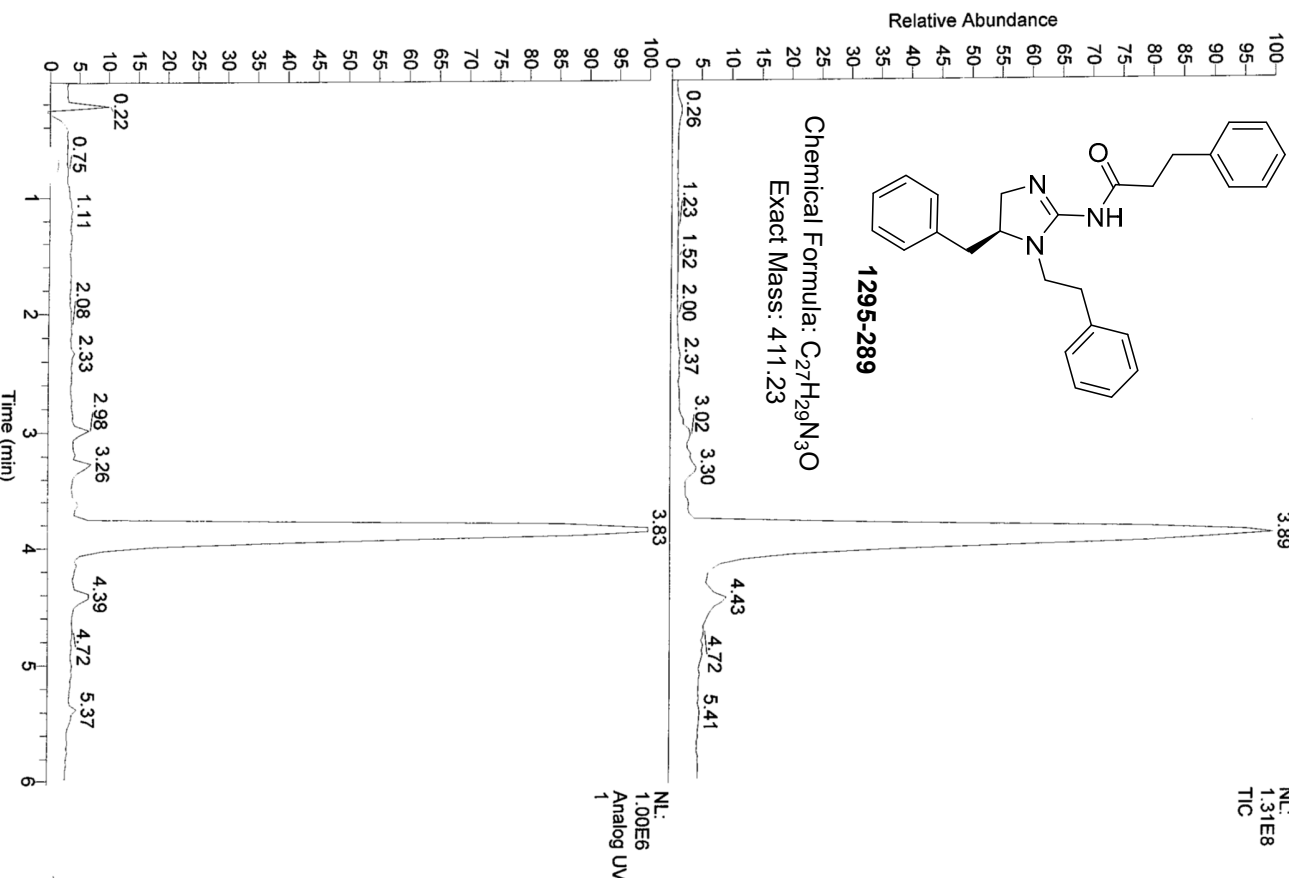

Experiment Method:  
C:\LCQ\Methods\ESI\Short-col\ESI5-95m8 Created: 11/11/97  
Creator: LCQ  
Administrator  
Summary: 5-95m8  
MS Run Time (min): 6.00  
Last modified: 3/3/01 by

Autosampler Settings:

S#: 88-107 RT: 3.55-4.27 AV: 20 NL: 2.81E7  
T: + c Full ms [50.00 - 2000.00]

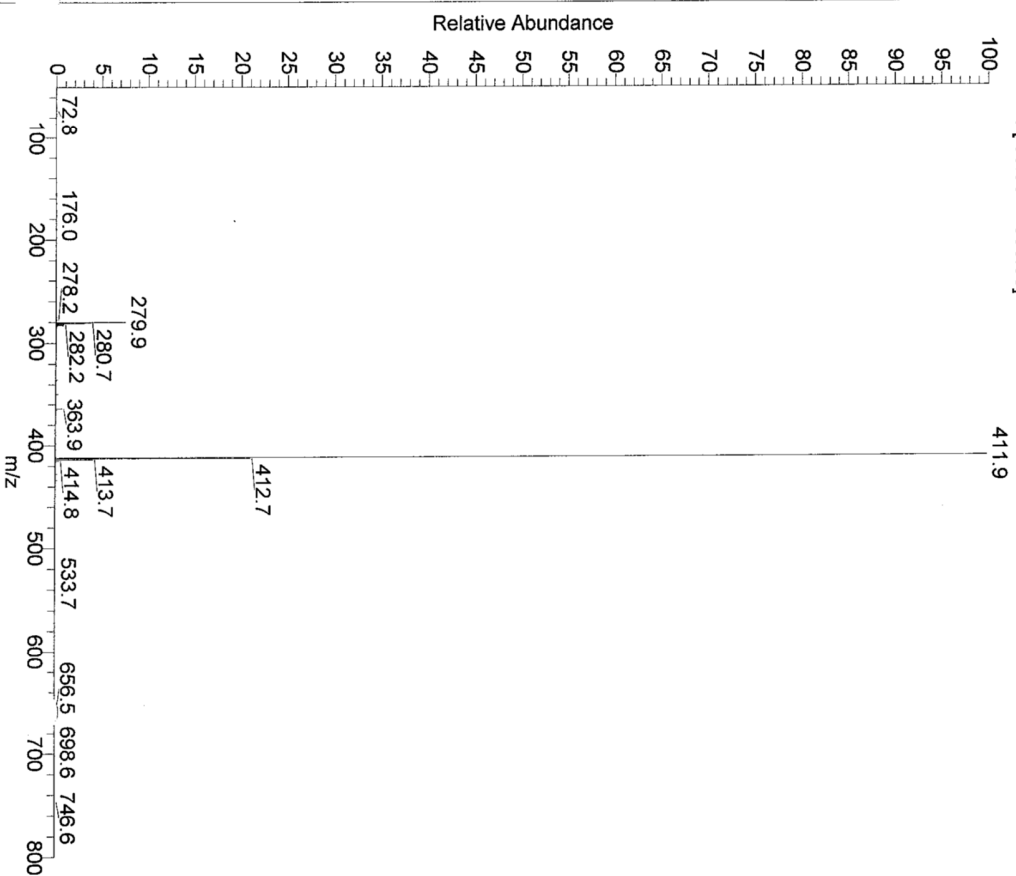

RT: 0.01 - 6.03

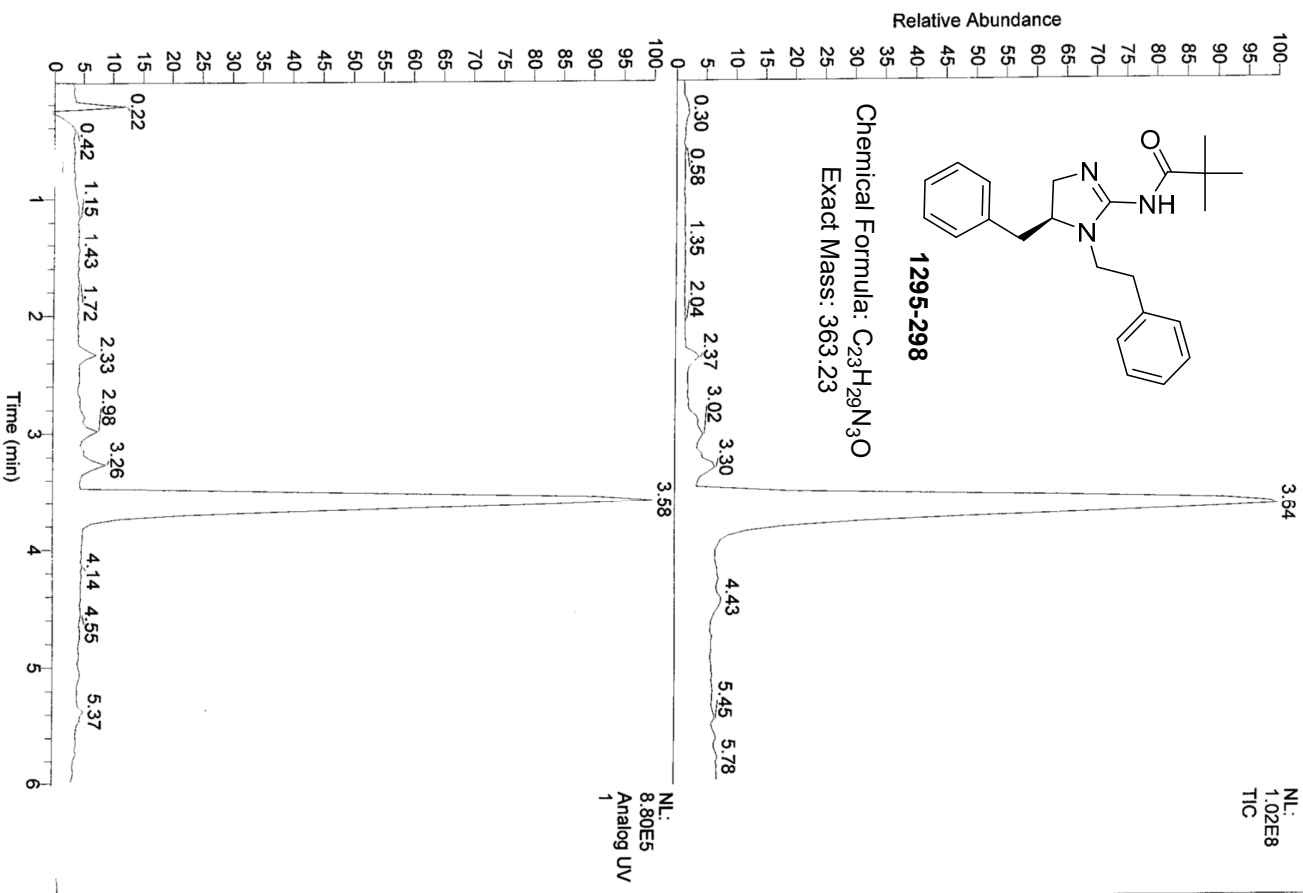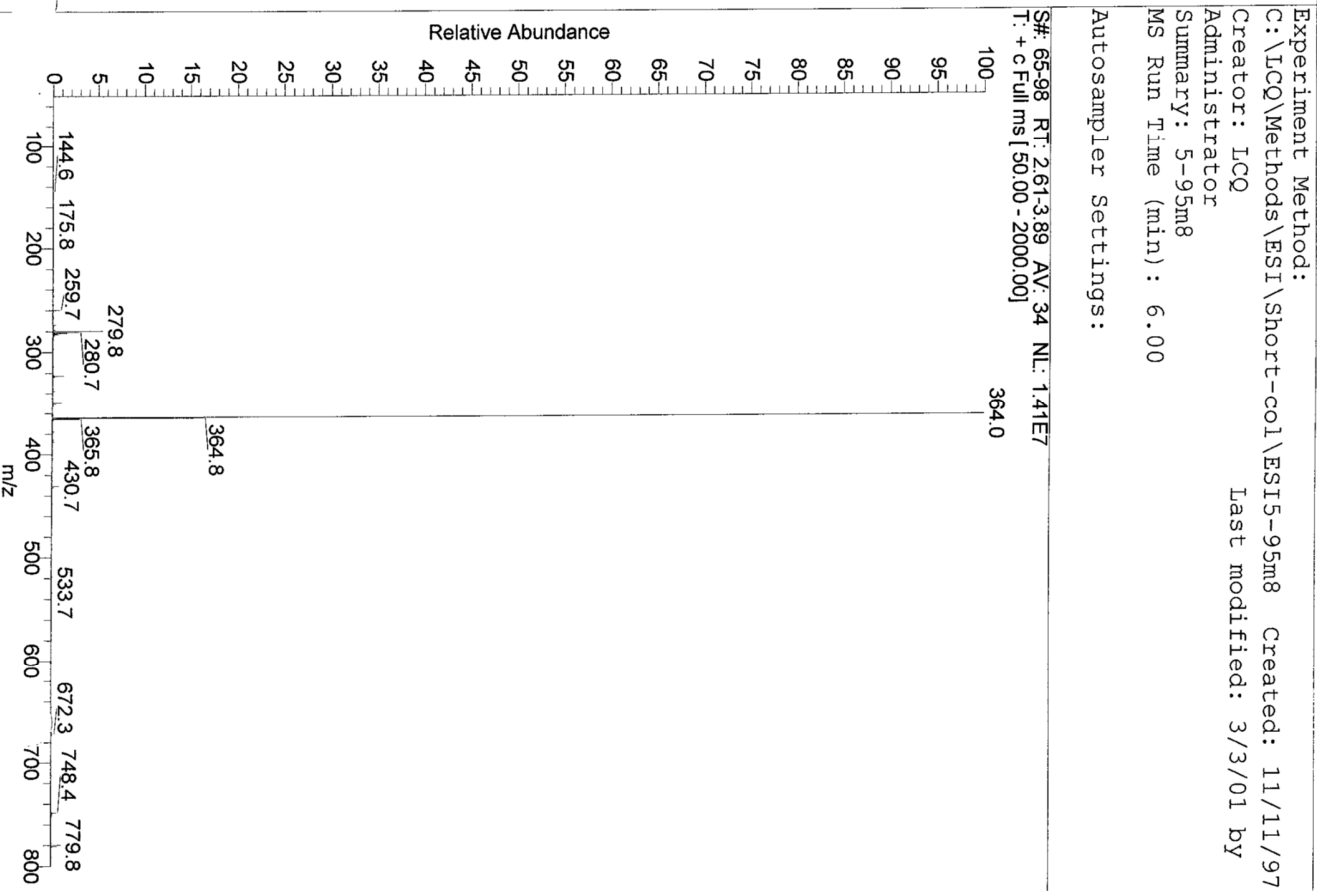

RT: 0.01 - 6.01

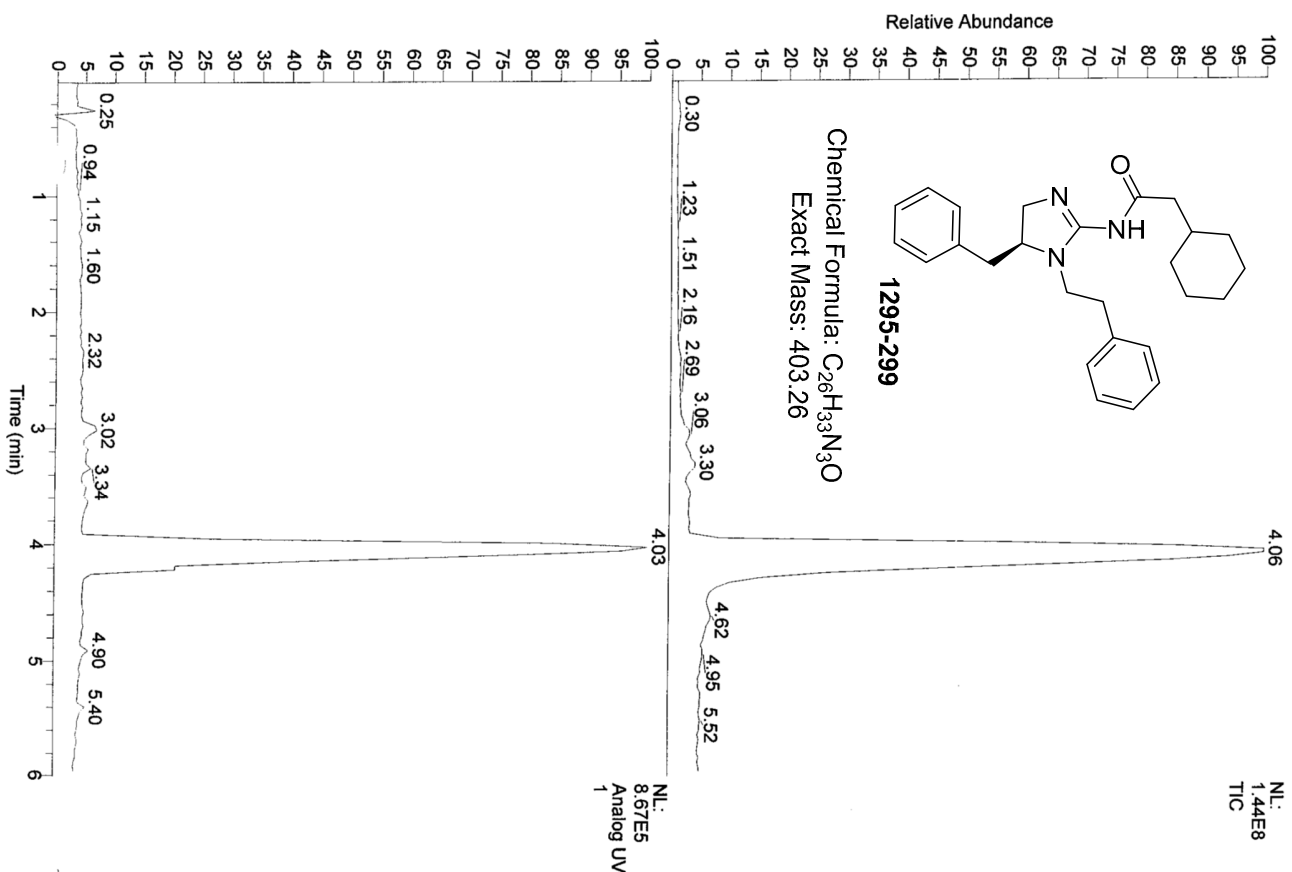

Experiment Method: C:\LCQ\Methods\ESI\Short-col\ESI5-95m8 Created: 11/11/97  
Creator: LCQ  
Administrator  
Summary: 5-95m8  
MS Run Time (min): 6.00

Autosampler Settings:

S#: 92-110 RT: 3.714.37 AV: 19 NL: 3.68E7  
I: + c Full ms [50.00 - 2000.00]

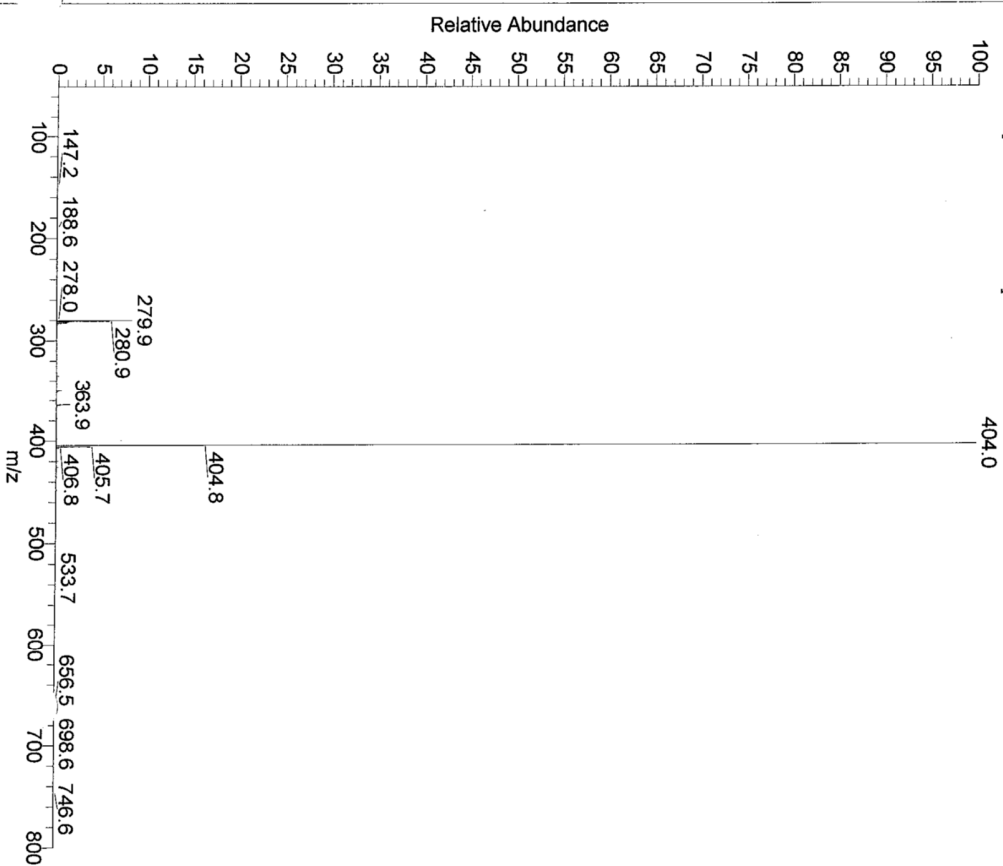

RT: 0.01 - 6.04

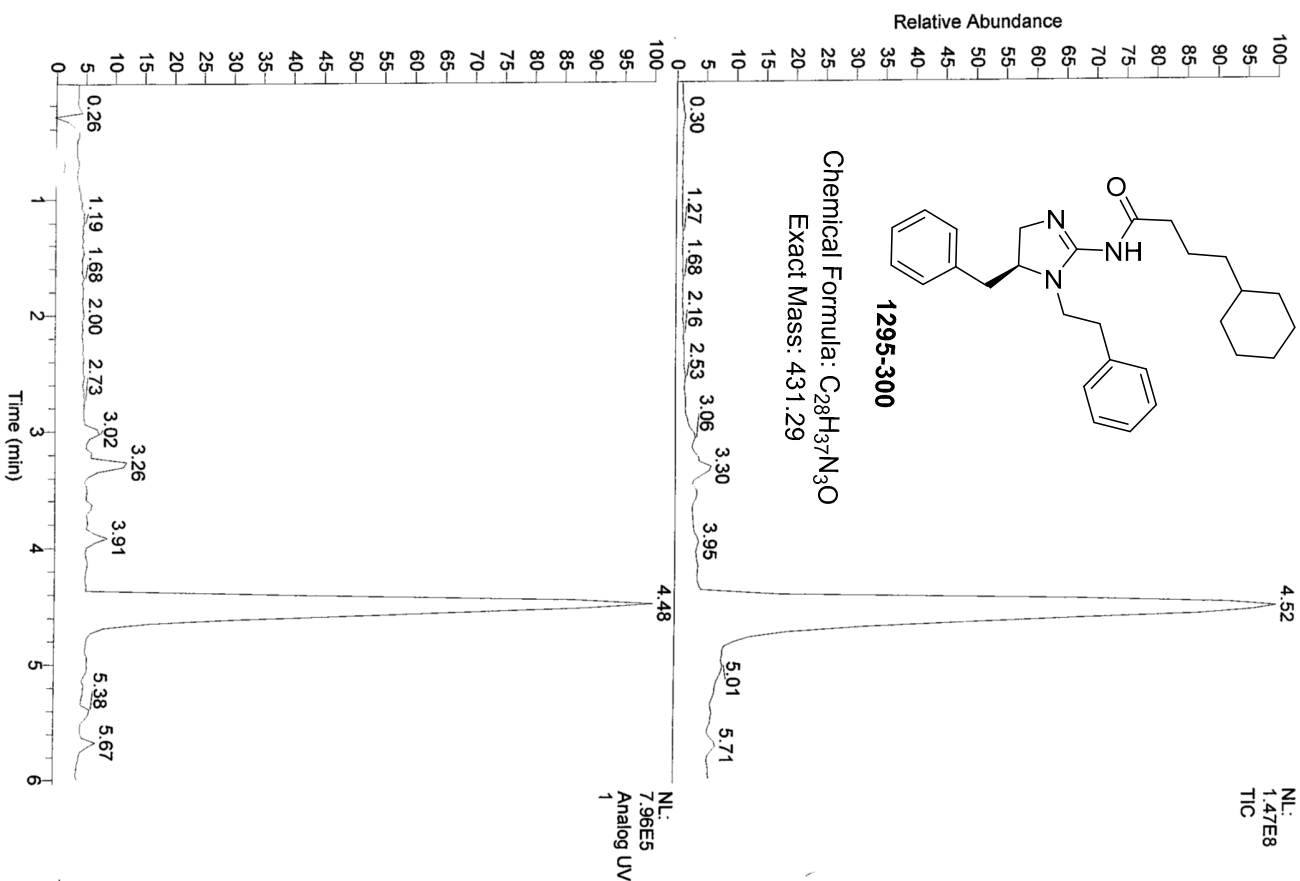

Experiment Method:  
C:\ICQ\Methods\ESI\Short-col\ESI5-95m8 Created: 11/11/97  
Creator: ICQ Last modified: 3/3/01 by  
Administrator  
Summary: 5-95m8  
MS Run Time (min): 6.00  
Autosampler Settings:

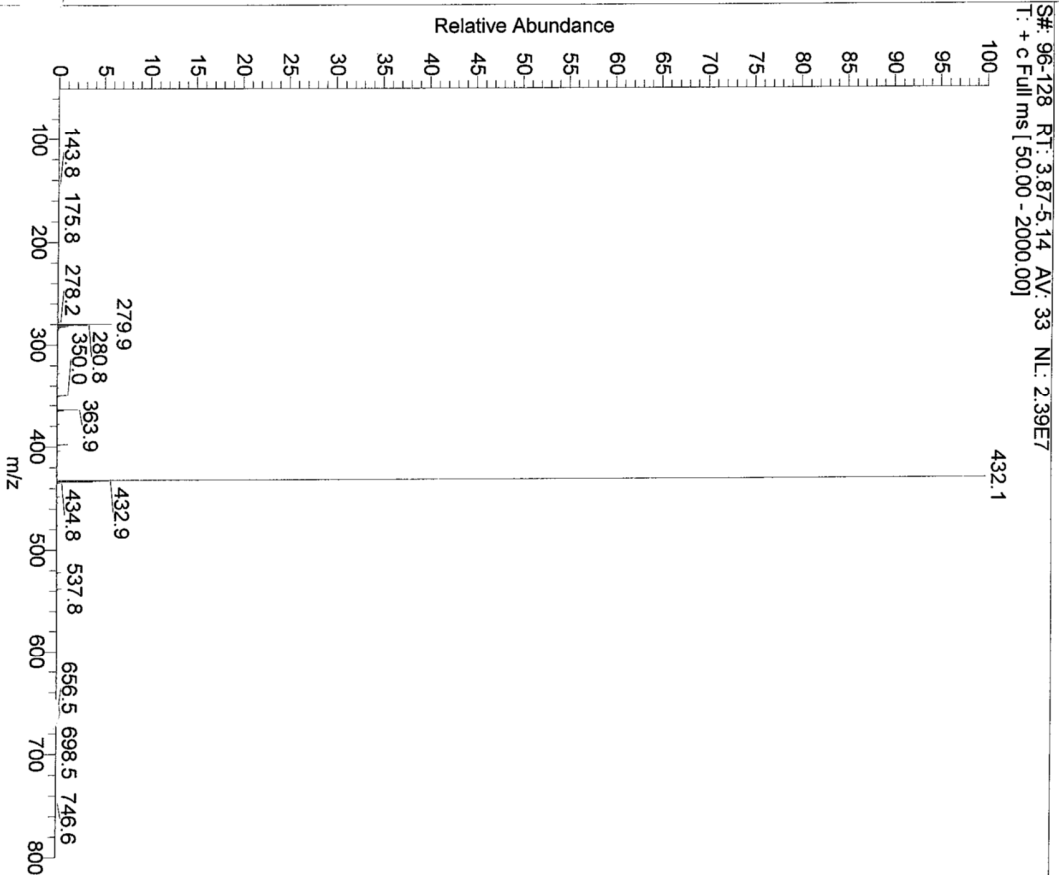

RT: 0.02 - 6.02

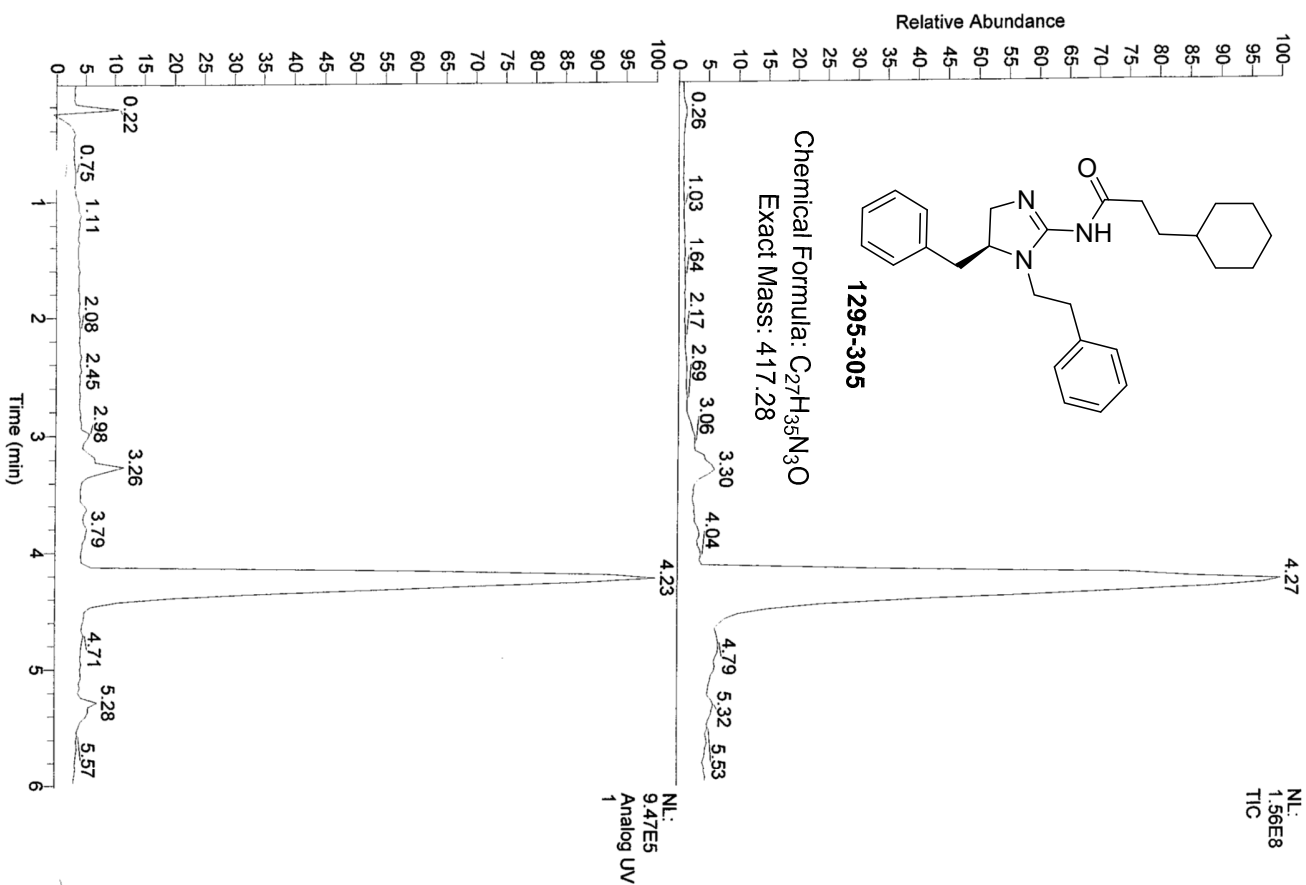

Experiment Method:

C:\LCQ\Methods\ESI\Short-col\ESI5-95m8 Created: 11/11/97

Creator: LCQ Last modified: 3/3/01 by

Administrator

Summary: 5-95m8

MS Run Time (min): 6.00

Autosampler Settings:

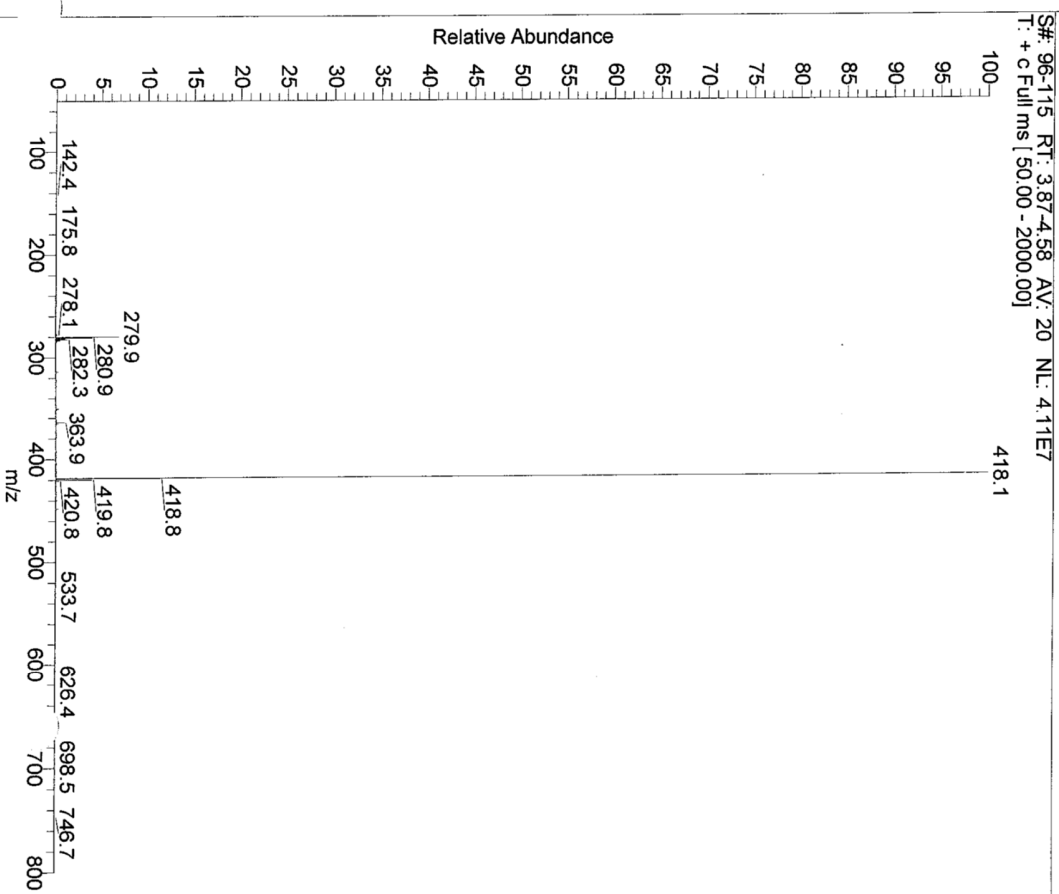

RT: 0.01 - 6.01

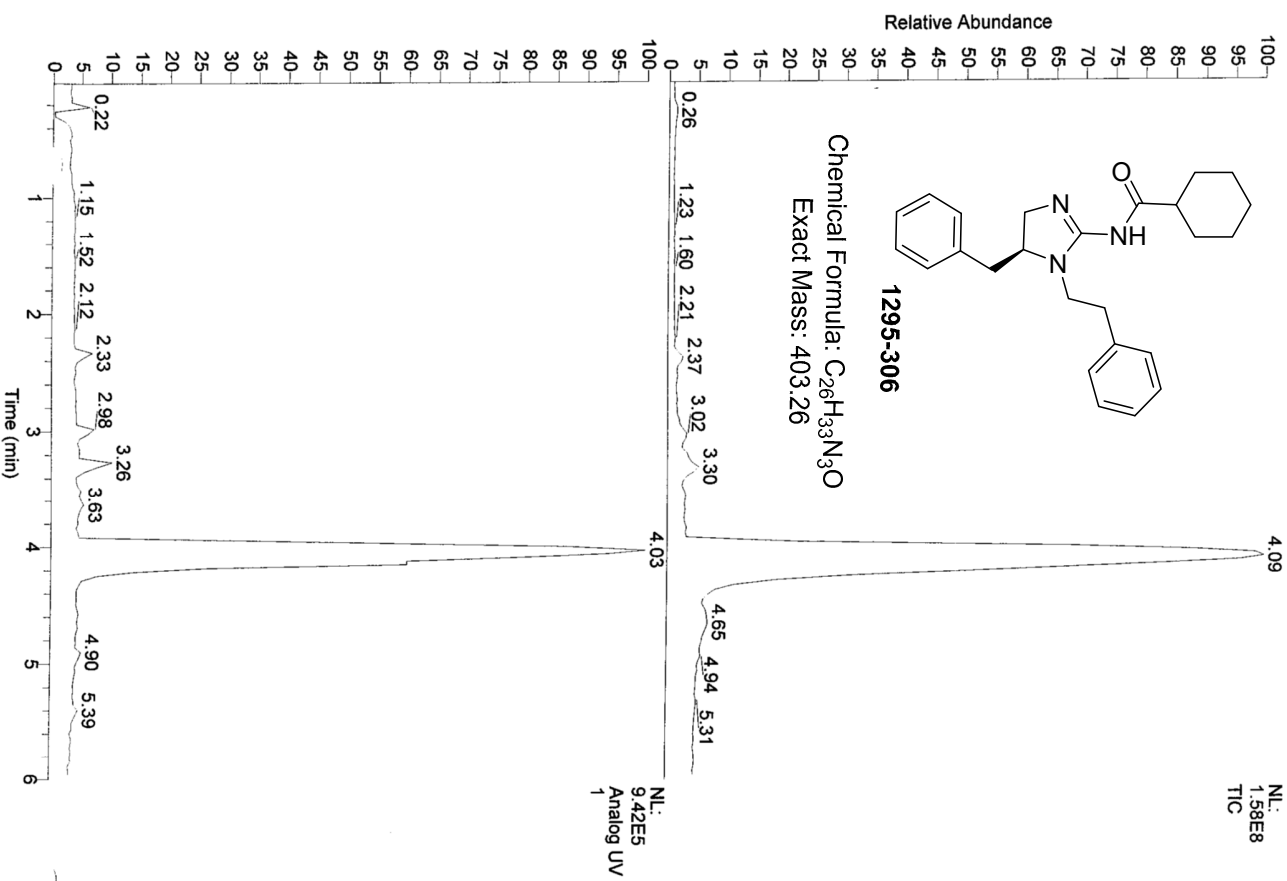

Experiment Method:  
C:\LCQ\Methods\ESI\Short-col\ESI5-95m8 Created: 11/11/97  
Creator: LCQ  
Administrator  
Summary: 5-95m8  
MS Run Time (min): 6.00  
Last modified: 3/3/01 by

Autosampler Settings:

S#: 92-111 RT: 3.71-4.41 AV: 20 NL: 4.22E7  
T: + c Full ms [50.00 - 2000.00]

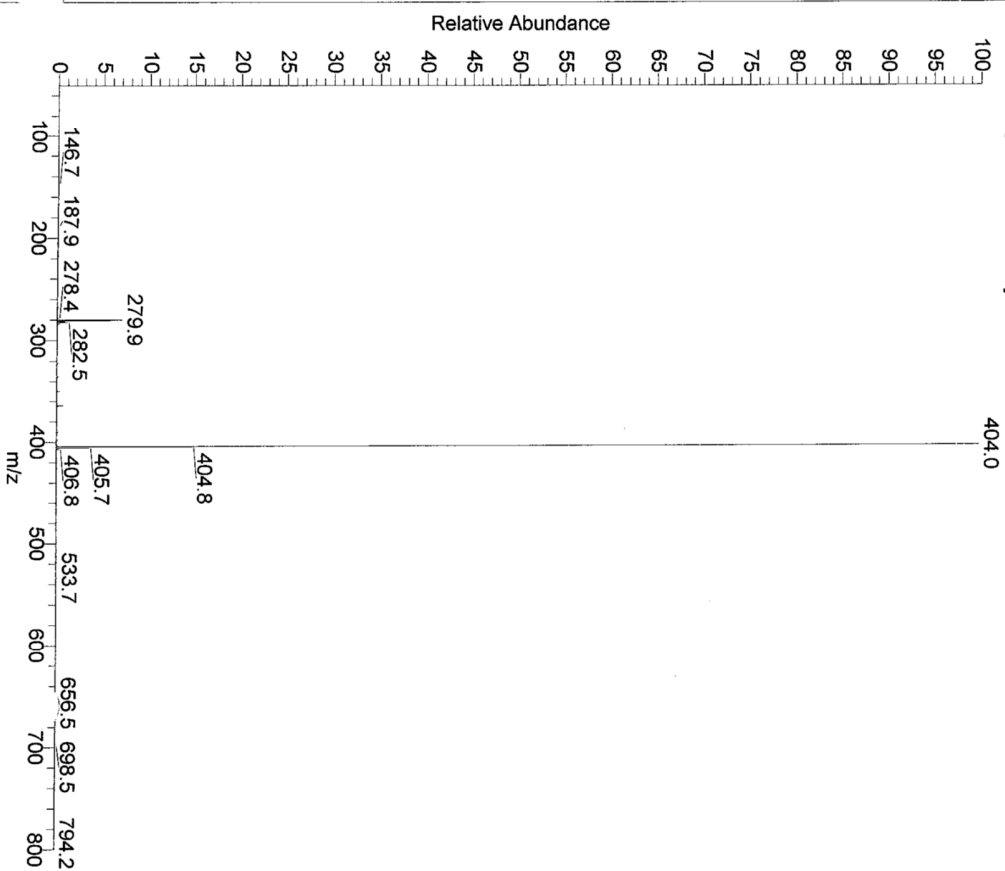



RT: 0.01 - 6.02

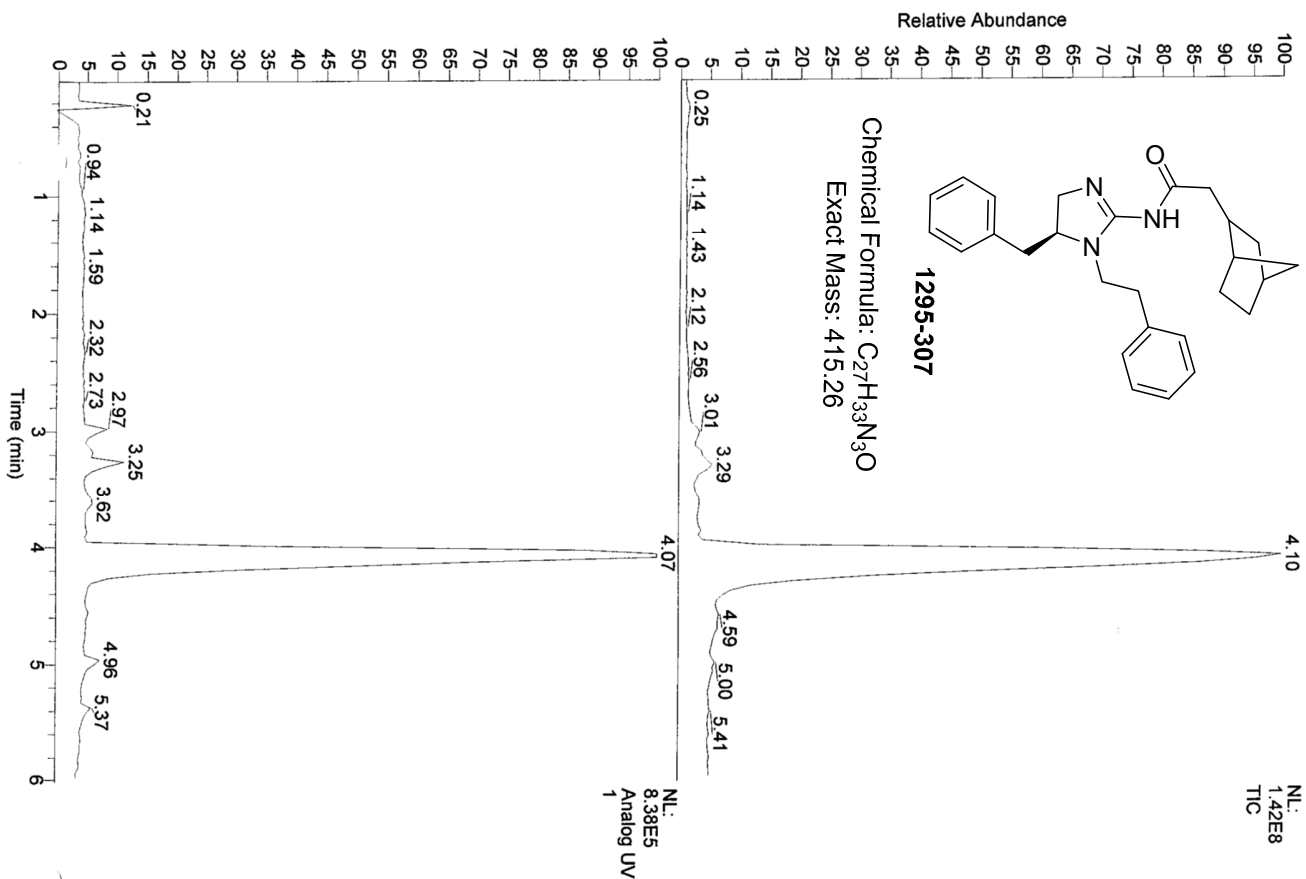

Experiment Method:  
C:\LCQ\Methods\ESI\Short-col\ESI5-95m8 Created: 11/11/97  
Creator: LCQ  
Administrator  
Summary: 5-95m8  
MS Run Time (min): 6.00

Autosampler Settings:

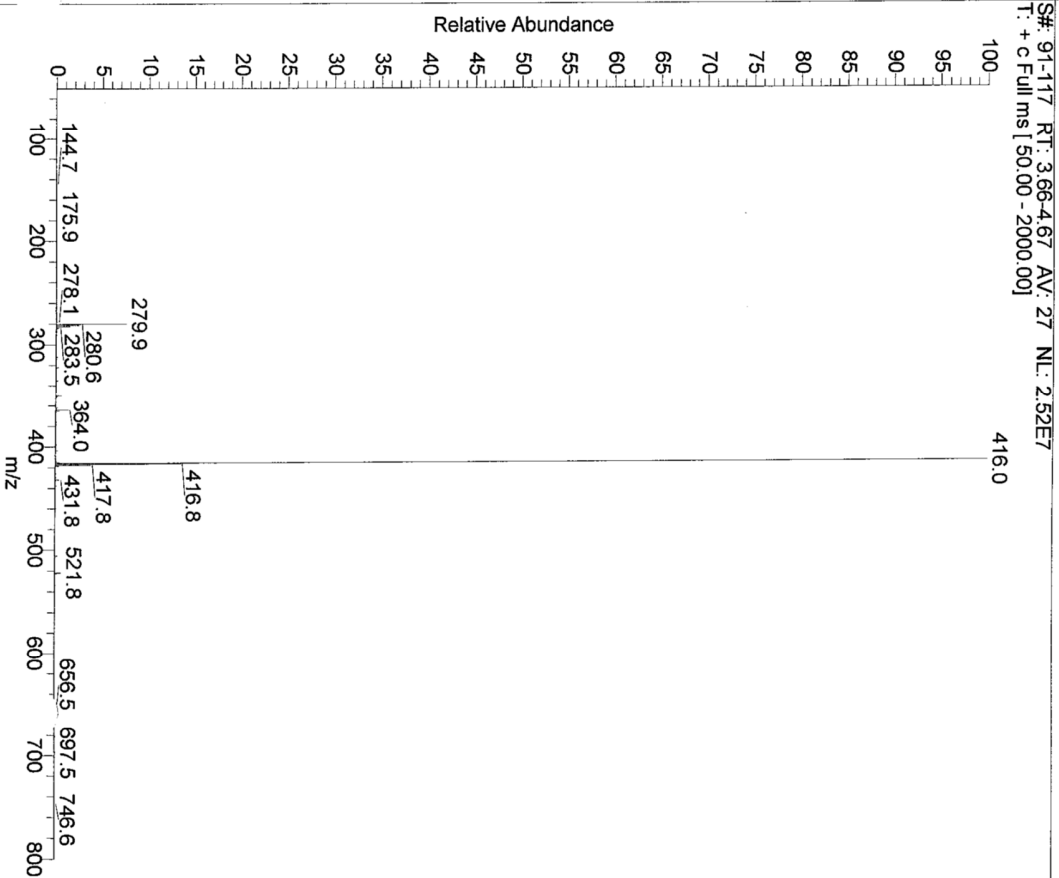

## 2520-31

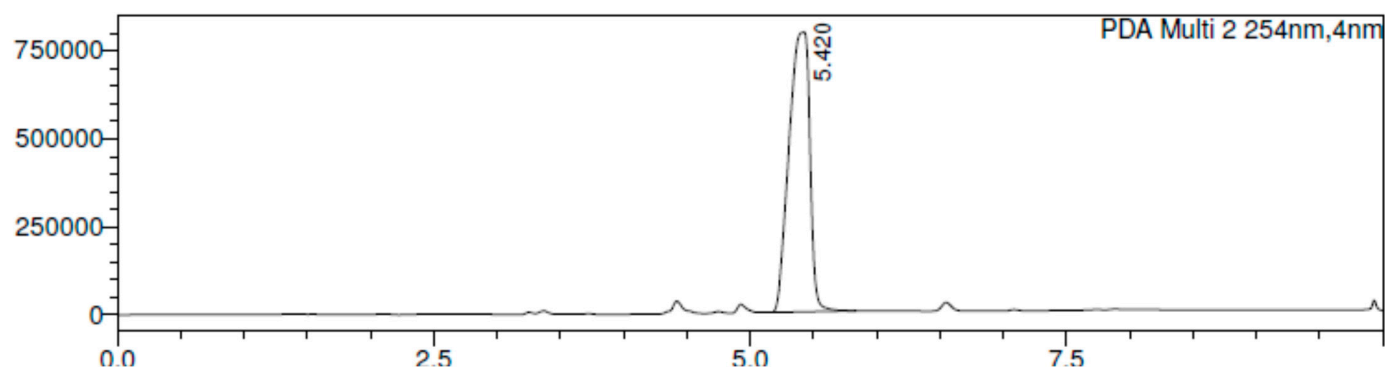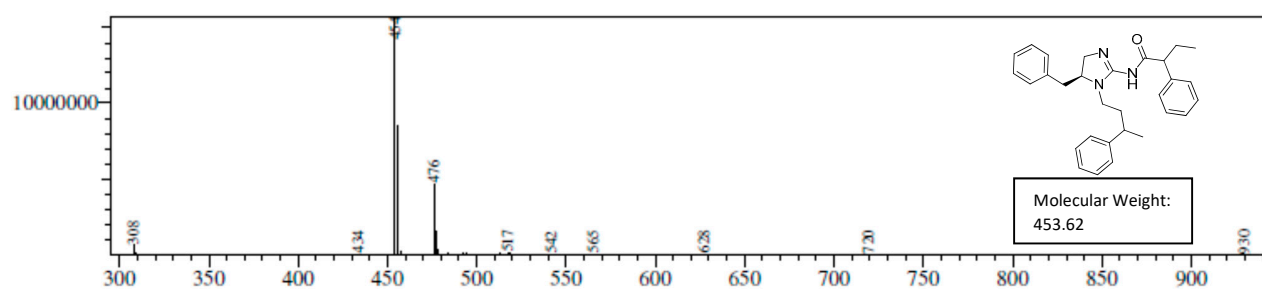

## 2520-39

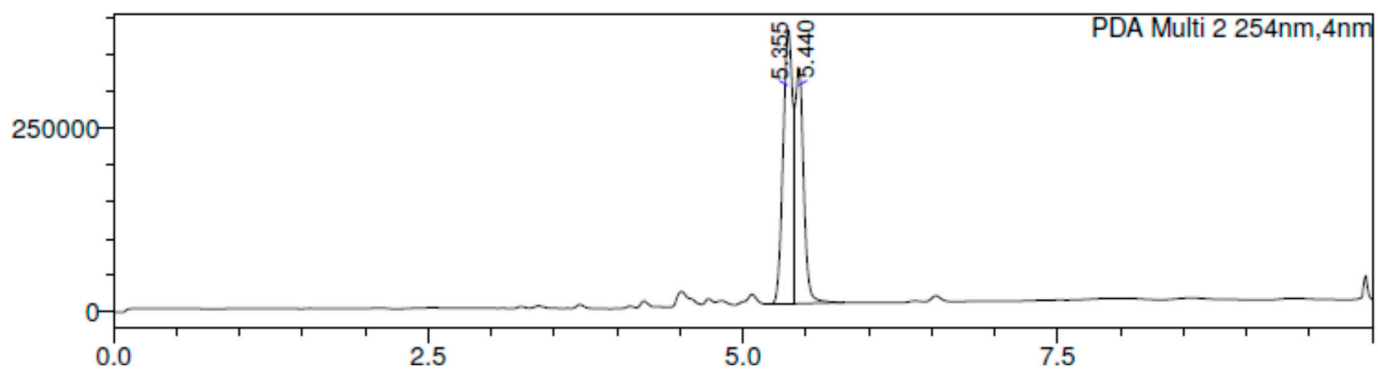

Diastereomeric mixture.

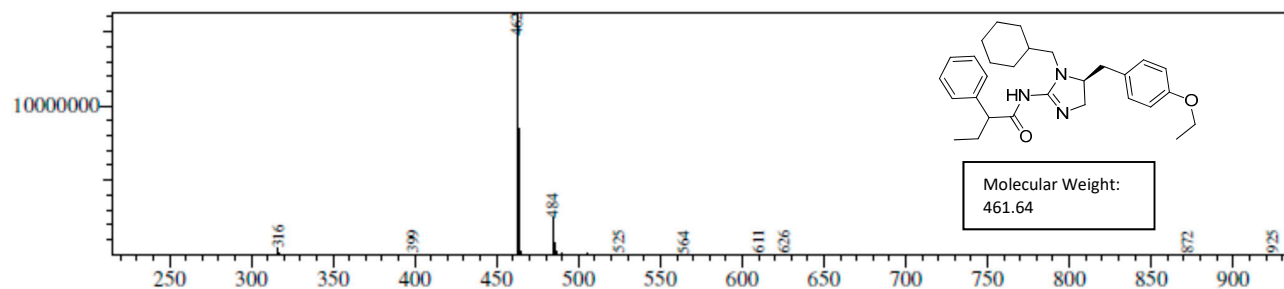

2520-47

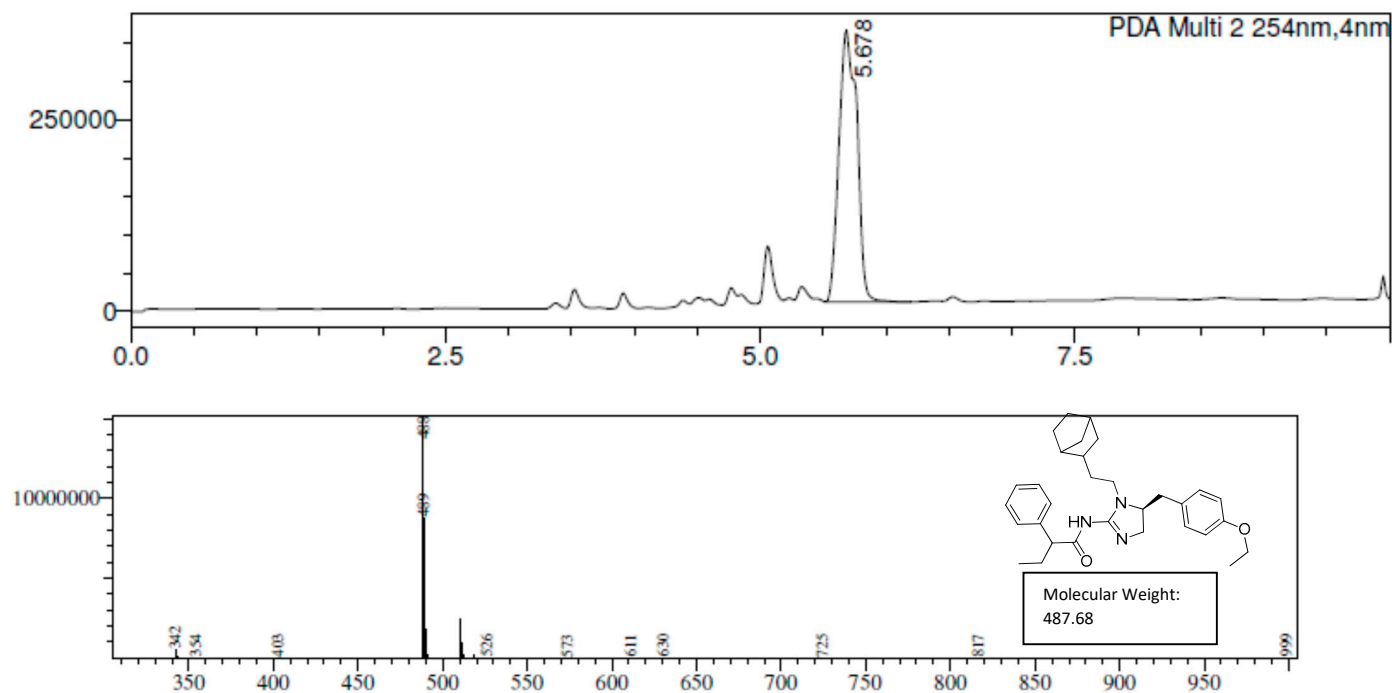

Supplement: s1 [file s1]
